# Supplementary material for: Psychological and Somatic challenges identified in a Menopause Rating Scale assessment of women living with HIV in Lagos, Nigeria
Source: Research Square preprint supplement (doi:10.21203/rs.3.rs-7032996/v1), 2025-08-06
Supplement: Supplementary file 1 [file 92b7ae0c3ec166899e54d684.xlsx]

## Sheet: Raw data HIV Grp
Form and Serial No.	Age (Years)	Marital Status	Education (Level)	Occupation	Menarche (Age) Years	Parity(no of children)	No.of sexual partners	Achieved menopause?	Age of Last Period (Yrs)	History of Menorrhagia	Contraception	Sexually active	Cigarette smoking	Alcohol use	Hypertension	Diabetes Mellitus	Night sweating	Cardiac complaints	Sleeping disorders	Joint/muscle complaints	Depression	Irritable	Anxious	Exhausted	Sexual problems	Urinary complaints	Vaginal dryness	Knowledge of Hormone Replacement Therapy	MRS Total Score
T1	37	Married	Secondary	Self Employed	15	2	3	Yes	50	No	Yes	Yes	No	No	No	No	No	No	Yes (mild)	No	Yes (mild)	No	No	No	No	No	No	No	2
T2	41	Married	Secondary	Fashion Designer	17	3	1	No		No	Yes	Yes	No	No	No	No	No	No	No	No	No	No	No	No	No	No	No	No	2
T3	46	Married	Secondary	Self Employed	15	0	3	No		Yes	No	Yes	No	Yes	No	No	No	No	No	Yes (mild)	No	No	No	Yes (mild)	No	Yes (mild)	Yes (moderate)	No	5
T4	49	Married	Tertiary	Business	15	3	2	Yes	47	No	Yes	Yes	No	No	No	No	No	No	No	Yes (moderate)	No	No	No	No	No	No	No	No	2
T5	51	Married	Secondary	Self Employed	15	2	1	No		No	No	Yes	No	No	No	No	No	No	Yes (mild)	Yes (mild)	No	Yes (mild)	No	Yes (mild)	No	No	No	No	4
T6	44	Divorced	Secondary	Self Employed	17	2	2	No		No	No	No	No	No	No	Yes	No	Yes (mild)	Yes (moderate)	Yes (severe)	Yes (moderate)	No	Yes (mild)	Yes (Moderate)	No	Yes (mild)	Yes (moderate)	No	14
T7	64	Divorced	Primary	Trader	13	3	3	Yes	47	Yes	Yes	No	No	Yes	Yes	Yes	No	No	No	Yes (mild)	No	No	No	No	No	No	Yes (moderate)	No	3
T8	43	Married	Tertiary	Teacher	15	2	2	No		Yes	Yes	Yes	No	Yes	No	No	No	No	Yes (moderate)	Yes (mild)	Yes (mild)	No	No	No	Yes (mild)	Yes (mild)	No	No	6
T9	48	Married	Primary	Self Employed	17	0	3	No		Yes	Yes	Yes	No	Yes	No	No	No	No	Yes (mild)	Yes (mild)	No	No	Yes (moderate)	No	No	No	No	No	4
T10	44	Married	Secondary	Business	16	1	5	Yes	49	No	Yes	Yes	No	No	No	No	No	No	No	No	No	No	No	No	No	No	No	No	0
T11	43	Married	Tertiary	Trader	17	2	3	No		No	Yes	Yes	No	No	No	No	No	No	No	No	Yes (moderate)	No	No	No	No	No	Yes (mild)	No	3
T12	49	Married	Secondary	Self Employed	14	4	6	No		No	Yes	Yes	No	Yes	Yes	No	No	No	Yes (mild)	No	No	Yes (mild)	No	No	No	No	Yes (mild)	Yes	3
T13	53	Single	Tertiary	Self Employed	Unk	0	2	Yes	45	Yes	No	No	No	No	No	No	Yes (moderate)	No	Yes (moderate)	Yes (mild)	No	No	No	No	No	No	No	Yes	5
T14	52	Married	Tertiary	Self Employed	11	4	4	No		No	No	Yes	No	Yes	No	No	No	No	Yes (mild)	No	No	Yes (mild)	Yes (mild)	No	No	No	No	No	3
T15	52	Married	Tertiary	Self Employed	14	2	3	No		Yes	Yes	Yes	No	No	No	No	No	Yes (mild)	Yes (moderate)	Yes (moderate)	Yes (mild)	Yes (mild)	Yes (mild)	No	No	No	No	No	8
T16	44	Married	Tertiary	Civil Servant	19	5	4	Yes	49	Yes	Yes	No	No	No	No	No	No	Yes (mild)	No	Yes (moderate)	Yes (mild)	Yes (mild)	Yes (mild)	Yes (mild)	No	No	Yes (mild)	No	8
T17	44	Married	Secondary	Self Employed	14	4	3	No		No	No	No	No	Yes (mild)	No	No	No	No	No	No	No	Yes (mild)	No	No	No	No	Yes (mild)	No	2
T18	46	Married	Primary	Self Employed	16	2	5	No		No	No	Yes	No	No	No	No	No	No	Yes (mild)	Yes (moderate)	Yes (mild)	No	Yes (moderate)	No	No	No	No	No	6
T19	43	Married	Tertiary	Self Employed	16	2	2	Yes	50	Yes	No	No	No	Yes	Yes	No	No	No	Yes (mild)	Yes (moderate)	No	No	Yes (mild)	No	No	Yes (mild)	No	No	5
T20	40	Single	Tertiary	Self Employed	14	0	4	No		No	Yes	Yes	No	Yes	No	No	No	No	No	Yes (mild)	No	No	No	No	No	No	No	No	1
T21	46	Married	Secondary	Self Employed	14	3	3	No		Yes	No	No	No	No	No	No	No	Yes (mild)	No	Yes (mild)	No	No	No	No	No	No	No	No	2
T22	43	Single	Tertiary	Self Employed	15	1	4	No		Yes	Yes	No	No	Yes	No	No	Yes (moderate)	No	No	Yes (mild)	No	No	No	No	No	No	Yes (moderate)	Yes	9
T23	53	Married	Tertiary	Civil Servant	13	4	4	Yes	46	Yes	No	No	No	No	Yes	No	No	Yes (moderate)	No	Yes (moderate)	No	No	Yes (moderate)	Yes (mild)	Yes (mild)	No	No	No	8
T24	45	Married	Tertiary	Self Employed	17	2	3	No		No	Yes	Yes	No	Yes	No	No	No	Yes (mild)	No	Yes (moderate)	Yes (mild)	Yes (mild)	No	Yes (mild)	No	No	No	Yes	6
T25	43	Married	Secondary	Self Employed	12	2	3	No		Yes	Yes	Yes	No	Yes	No	No	No	No	No	Yes (moderate)	Yes (moderate)	No	No	No	Yes (mild)	No	Yes (mild)	No	6
T26	48	Married	Secondary	Self Employed	16	1	6	Yes	51	Yes	No	No	No	Yes	Yes	No	No	Yes (mild)	No	Yes (moderate)	No	No	Yes (mild)	No	No	No	No	No	4
T27	58	Single	Secondary	Self Employed	12	3	5	No		No	No	No	No	No	No	No	No	No	Yes (moderate)	No	No	No	No	No	No	No	No	No	2
T28	49	Widowed	Secondary	Self Employed	18	1	2	Yes	49	No	Yes	No	No	No	Yes	No	No	No	No	No	No	Yes (mild)	No	No	No	No	No	No	1
T29	50	Married	Tertiary	Self Employed	14	2	5	No		No	No	Yes	No	No	No	No	No	No	Yes (moderate)	No	No	No	No	No	No	No	Yes (mild)	No	3
T30	50	Married	Tertiary	Teacher	12	2	5	Yes	49	No	Yes	Yes	No	No	Yes	No	No	No	No	Yes (moderate)	No	No	No	No	No	No	No	No	2
T31	58	Divorced	Secondary	Trader	13	5	3	Yes	43	Yes	No	No	No	Yes	No	No	Yes (mild)	No	Yes (mild)	Yes (mild)	No	No	No	No	No	No	No	No	3
T32	49	Widowed	Secondary	Trader	14	3	3	Yes	46	No	Yes	Yes	No	No	Yes	No	Yes (mild)	No	No	No	Yes (mild)	No	No	Yes (mild)	No	No	No	No	3
T33	54	Married	Primary	Civil Servant	14	4	1	No		No	No	No	No	No	Yes	Yes	No	No	Yes (severe)	Yes (mild)	No	No	No	Yes (severe)	No	Yes (very severe)	No	No	11
T34	35	Single	Tertiary	Self Employed	15	0	1	No		Yes	No	Yes	No	No	No	No	No	No	No	Yes (mild)	Yes (mild)	Yes (moderate)	Yes (mild)	No	Yes (moderate)	No	Yes (moderate)	No	9
T35	43	Married	Tertiary	Civil Servant	14	0	3	No		No	No	No	No	No	No	No	No	No	Yes (moderate)	No	No	Yes (mild)	Yes (mild)	No	No	No	Yes (mild)	No	5
T36	36	Married	Tertiary	Self Employed	17	0	2	No		No	No	Yes	No	No	No	No	No	No	No	No	No	No	No	No	No	No	No	No	0
T37	37	Married	Tertiary	Self Employed	21	4	3	No		No	No	No	No	No	Yes	No	No	Yes (mild)	Yes (severe)	Yes (mild)	Yes (moderate)	Yes (moderate)	Yes (mild)	No	Yes (mild)	No	Yes (moderate)	No	13
T38	50	Married	Secondary	Self Employed	18	2	2	Yes	48	No	Yes	Yes	No	Yes	No	No	No	No	No	No	No	No	No	No	No	No	No	No	0
T39	52	Single	Primary	No Job	14	0	0	No		Yes	No	No	No	No	Yes	No	No	No	No	Yes (mild)	No	Yes (severe)	Yes (moderate)	No	Yes (mild)	No	No	No	7
T40	49	Married	Secondary	Self Employed	18	3	4	No		Yes	Yes	Yes	No	No	No	No	No	No	Yes (mild)	Yes (moderate)	No	Yes (mild)	No	No	No	No	No	No	4
T41	43	Married	Secondary	Self Employed	17	3	2	No		No	Yes	Yes	No	No	No	No	No	Yes (mild)	No	Yes (moderate)	No	Yes (moderate)	No	No	No	No	No	No	5					v
T42	43	Single	Tertiary	Self Employed	14	1	5	Yes	50	No	Yes	Yes	No	No	No	No	No	No	No	No	No	No	No	No	No	No	No	No	0
T43	38	Married	Tertiary	Civil Servant	16	1	3	No		No	No	Yes	No	No	No	No	No	No	No	Yes (mild)	No	No	No	No	No	No	Yes (mild)	No	2
T44	55	Widowed	Secondary	Trader	14	2	4	No		Yes	Yes	No	No	Yes	Yes	No	No	No	Yes (mild)	Yes (mild)	No	No	No	No	No	No	Yes (mild)	No	2
T45	35	Single	Tertiary	Business	16	0	4	No		No	No	No	No	Yes	Yes	No	No	No	Yes (mild)	No	No	Yes (mild)	No	No	No	No	No	No	2
T46	58	Widowed	Secondary	Trader	15	1	2	No		Yes	No	No	No	Yes	Yes	No	No	No	Yes (moderate)	No	No	Yes (moderate)	No	No	No	No	Yes (severe)	Yes	7
T47	52	Married	Secondary	Trader	17	5	3	No		No	Yes	No	No	No	No	Yes	No	No	No	Yes (mild)	No	Yes (mild)	No	No	No	No	No	No	2
T48	47	Widowed	Tertiary	Teacher	14	1	1	Yes	46	Yes	No	No	No	No	No	No	No	No	No	Yes (mild)	No	No	No	No	No	No	No	No	1
T49	38	Married	Primary	Trader	15	1	2	No		Yes	Yes	Yes	No	No	No	No	No	No	No	Yes (severe)	No	No	Yes (mild)	Yes (mild)	No	No	No	No	5
T50	60	Single	Tertiary	Self Employed	18	1	6	No		Yes	Yes	No	No	Yes	Yes	No	No	No	No	No	No	No	No	No	No	No	No	No	0
T51	41	Married	Tertiary	Business	16	2	3	Yes	48	No	Yes	Yes	No	No	No	No	No	No	No	Yes (mild)	Yes (moderate)	No	No	No	Yes (mild)	No	Yes (very severe)	No	8
T52	57	Widowed	Secondary	Trader	16	4	1	No		No	Yes	No	No	No	No	No	No	No	No	Yes (mild)	Yes (mild)	Yes (mild)	No	No	No	No	No	No	3
T53	47	Married	Secondary	Teacher	16	4	2	No		No	Yes	Yes	No	No	Yes	No	No	No	No	Yes (moderate)	No	No	Yes (mild)	No	No	No	No	No	3
T54	64	Married	Secondary	Trader	18	6	3	No		No	No	No	No	Yes (stopped)	Yes	Yes	No	Yes (mild)	No	Yes (very severe)	Yes (mild)	No	No	No	No	No	Yes (very severe)	No	10
T55	58	Widowed	Secondary	Trader	14	4	1	Yes	48	No	No	No	No	No	Yes	No	No	No	No	No	Yes (moderate)	No	No	No	No	No	Yes (mild)	No	3
T56	49	Married	Tertiary	Business	Unk	3	2	No		Yes	No	Yes	No	Yes	No	No	No	No	No	No	No	No	No	Yes (mild)	No	No	No	No	0
T57	64	Widowed	Primary	Unemployed	16	3	2	No		No	No	No	No	Yes (stopped)	Yes	No	No	No	No	Yes (very severe)	Yes (mild)	No	Yes (mild)	No	No	No	No	No	5
T58	41	Single	Tertiary	Business	16	0	10	No		Yes	Yes	No	No	No	No	No	No	No	Yes (mild)	Yes (moderate)	Yes (mild)	No	Yes (mild)	No	No	No	No	No	3
T59	49	Single	Tertiary	Unemployed	14	1	1	No		Yes	No	No	No	No	No	No	No	No	No	Yes (mild)	No	No	Yes (mild)	No	No	No	No	No	4
T60	42	Married	Primary	Trader	12	3	3	No		No	Yes	Yes	No	No	No	No	No	No	No	No	No	No	No	No	Yes (severe)	No	Yes (very severe)	No	7
T61	52	Married	Secondary	Teacher	12	3	2	Yes	49	No	No	No	No	No	Yes	Yes	No	No	yes (mild)	Yes (moderate)	No	Yes (mild)	Yes (mild)	Yes (mild)	Yes (severe)	Yes (mild)	No	No	8
T62	44	Widowed	Tertiary	Civil Servant	14	2	3	No		No	Yes	Yes	No	No	No	No	No	No	Yes (moderate)	Yes (mild)	Yes (mild)	Yes (moderate)	Yes (moderate)	Yes (mild)	Yes (severe)	No	Yes (severe)	Yes	15
T63	37	Married	Tertiary	Trader	16	2	3	No		No	No	Yes	No	No	No	No	Yes (mild)	No	No	Yes (mild)	Yes (mild)	Yes (mild)	No	No	No	No	No	No	4
T64	49	Widowed	Secondary	Teacher	12	7	2	No		Yes	No	No	No	No	No	No	No	No	No	No	No	No	No	No	No	No	No	No	0
T65	56	Married	Secondary	Unemployed	15	6	2	Yes	48	No	Yes	No	No	No	Yes	No	Yes (severe)	Yes (moderate)	Yes (severe)	No	Yes (moderate)	No	No	No	No	No	No	No	9
T66	56	Widowed	Secondary	Business	14	4	10	Yes	53	No	Yes	No	No	No	Yes	No	No	No	No	Yes (mild)	Yes (mild)	No	Yes (mild)	No	No	No	No	No	3
T67	47	Married	Tertiary	Trader	16	4	5	No		No	Yes	Yes	No	Yes	Yes	No	No	Yes (mild)	No	No	No	No	No	No	No	No	No	No	1
T68	46	Married	Tertiary	Trader	15	3	2	No		No	No	Yes	No	No	No	No	No	No	No	No	No	No	No	No	No	No	No	Yes	0
T69	48	Divorced	Secondary	Factory Worker	19	2	5	No		Yes	Yes	Yes	No	No	No	No	No	No	No	No	Yes (mild)	Yes (mild)	No	No	No	No	Yes (mild)	No	3
T70	45	Widowed	Secondary	Trader	14	3	2	No		Yes	No	No	No	Yes	No	No	No	No	No	No	No	No	No	No	No	No	No	No	0
T71	42	Married	Secondary	Trader	Unk	2	1	No		Yes	Yes	Yes	No	No	No	No	No	No	No	Yes (mild)	No	No	No	No	No	No	No	No	1
T72	49	Married	Secondary	Self Employed	16	4	1	Yes	48	Yes	Yes	Yes	No	No	Yes	No	No	No	No	Yes (mild)	No	No	No	No	No	No	No	No	1
T73	49	Married	Secondary	Civil Servant	16	2	5	No		Yes	No	Yes	No	Yes (occasionally)	Yes	No	Yes (severe)	No	No	No	No	No	Yes (moderate)	No	No	No	No	No	5
T74	43	Single	Secondary	Self Employed	16	0	1	No		Yes	No	No	No	No	No	No	Yes (moderate)	No	Yes (moderate)	Yes (mild)	No	No	No	No	No	No	No	No	5
T75	46	Single	Secondary	Self Employed	14	1	6	No		No	No	No	No	Yes	Yes	No	No	No	No	Yes (moderate)	Yes (mild)	No	No	No	Yes (moderate)	No	No	No	5
T76	45	Widowed	Secondary	Self Employed	16	3	3	No		No	Yes	Yes	No	No	No	No	No	No	No	Yes (moderate)	Yes (moderate)	No	Yes (moderate)	Yes (severe)	No	No	Yes (moderate)	No	11
T77	52	Single	Tertiary	Trader	14	2	1	Yes	51	No	Yes	Yes	No	No	No	No	No	No	No	No	No	No	No	No	No	No	No	No	0
T78	45	Married	Primary	Trader	14	2	2	No		Yes	Yes	Yes	No	No	No	No	Yes (mild)	No	No	Yes (mild)	Yes (mild)	Yes (mild)	Yes (mild)	Yes (very severe)	No	No	Yes (mild)	No	10
T79	57	Married	Tertiary	Self Employed	15	5	2	Yes	50	No	Yes	Yes	No	No	No	No	No	No	No	No	No	No	No	No	No	No	No	No	0
T80	52	Widowed	Tertiary	Trader	14	4	2	Yes	50	Yes	No	No	No	No	No	No	No	No	No	No	Yes (moderate)	No	No	No	No	No	No	No	2
T81	41	Married	Primary	Trader	16	1	5	No		No	No	No	No	Yes	No	No	No	No	No	No	No	Yes (severe)	Yes (severe)	No	No	No	No	No	6
T82	65	Widowed	Tertiary	Retired	14	3	3	Yes	48	No	Yes	No	No	No	Yes	No	Yes (moderate)	No	No	Yes (mild)	No	No	No	No	No	No	No	No	3
T83	46	Married	Secondary	Business	15	2	5	No		Yes	Yes	Yes	No	No	No	No	Yes (mild)	No	No	Yes (mild)	No	No	No	No	No	No	No	No	2
T84	40	Married	Primary	Trader	Unk	3	1	No		No	No	Yes	No	No	No	No	No	No	No	No	Yes (mild)	Yes (mild)	Yes (mild)	No	No	No	No	No	3
T85	43	Widowed	Secondary	Self Employed	17	1	2	No		Yes	No	No	No	Yes (occasionally)	No	No	No	Yes (moderate)	Yes (severe)	Yes (moderate)	Yes (moderate)	No	No	No	No	No	No	No	9
T86	40	Married	Tertiary	Entrepreneur	16	2	3	No		Yes	Yes	Yes	No	No	No	No	No	Yes (mild)	No	Yes (mild)	Yes (moderate)	No	No	No	No	No	No	No	4
T87	48	Widowed	Secondary	Unemployed	15	1	1	Yes	44	No	Yes	No	No	No	No	No	No	No	No	No	Yes (moderate)	No	Yes (mild)	Yes (mild)	No	No	Yes (mild)	No	5
T88	51	Married	Tertiary	Civil Servant	13	1	6	Yes	45	No	Yes	No	No	Yes (occasionally)	No	No	No	No	No	Yes (mild)	No	No	No	No	No	No	Yes (mild)	No	2
T89	58	Widowed	Secondary	Self Employed	12	3	2	Yes	57	No	Yes	Yes	No	No	Yes	No	No	No	No	Yes (mild)	No	No	No	No	No	No	No	No	1
T90	50	Married	Tertiary	Self Employed	16	2	3	No		No	No	Yes	No	No	No	No	Yes (mild)	No	No	Yes (mild)	Yes (mild)	No	Yes (mild)	No	No	No	No	No	4
T91	47	Married	Tertiary	Self Employed	15	4	1	Yes	46	No	No	No	No	Yes	No	No	Yes (severe)	Yes (severe)	No	Yes (severe)	Yes (mild)	No	Yes (mild)	Yes (severe)	No	No	No	No	14
T92	63	Widowed	Primary	Fashion Designer	15	4	1	Yes	52	No	No	No	No	No	Yes	No	No	No	No	Yes (severe)	No	No	No	No	No	No	No	No	3
T93	45	Divorced	Tertiary	Teacher	15	3	1	No		No	No	Yes	No	No	No	No	Yes (severe)	Yes (mild)	No	No	No	Yes (mild)	No	No	No	No	No	No	5
T94	47	Married	Primary	Trader	13	3	1	No		No	Yes	Yes	No	Yes	No	No	No	No	No	Yes (moderate)	No	No	No	No	No	No	No	No	2
T95	44	Widowed	Secondary	Farmer	15	3	3	No		No	Yes	No	No	No	No	No	No	Yes (mild)	No	No	No	No	No	No	No	No	No	No	1
T96	43	Married	Primary	Hairdresser	18	2	1	No		Yes	No	Yes	No	No	No	No	No	No	No	No	No	No	No	Yes (mild)	No	No	No	No	1
T97	59	Divorced	Primary	Trader	17	5	2	Yes	55	Yes	Yes	No	No	No	Yes	No	No	No	No	No	No	No	Yes (mild)	No	No	No	No	No	1
T98	45	Widowed	Secondary	Trader	20	3	1	No		No	No	No	No	No	Yes	No	No	No	Yes (moderate)	No	No	No	No	No	No	No	No	No	2
T99	42	Single	Secondary	Sales Rep	15	1	4	No		No	Yes	No	No	Yes	No	No	No	Yes (mild)	No	Yes (mild)	No	No	No	No	No	Yes (mild)	No	No	4
T100	52	Married	Tertiary	Business	16	4	1	Yes	51	No	Yes	Yes	No	Yes	No	No	No	Yes (mild)	No	Yes (mild)	No	No	No	No	No	No	No	No	3
T101	47	Married	Tertiary	Trader	15	3	1	No		No	No	Yes	No	No	No	No	No	No	No	No	No	No	No	No	No	Yes (moderate)	No	No	2
T102	40	Married	Secondary	Trader	17	4	1	No		Yes	Yes	Yes	No	No	No	Yes	No	No	No	Yes (severe)	Yes (mild)	No	No	No	No	No	No	No	4
T103	57	Married	Secondary	Trader	16	4	2	No		No	No	Yes	No	Yes	Yes	No	No	No	No	Yes (mild)	No	No	No	No	Yes (mild)	No	No	No	2
T104	52	Married	Primary	company	14	0	1	Yes	47	Yes	No	Yes	No	No	Yes	No	No	Yes (mild)	No	Yes (severe)	No	No	No	No	No	No	No	No	4
T105	56	Married	Secondary	Trader	14	2	1	Yes	47	No	No	No	No	Yes	Yes	No	Yes (mild)	No	Yes (mild)	Yes (mild)	Yes (moderate)	No	Yes (moderate)	No	No	No	Yes (moderate)	No	9
T106	62	Widowed	Secondary	Trader	18	6	1	Yes	44	No	No	No	No	yes	No	No	No	No	No	yes (mild)	No	No	No	No	No	No	No	No	1
T107	41	Divorced	Secondary	Trader	13	4	5	No		No	No	No	No	yes	No	No	No	Yes (severe)	No	Yes (very severe)	No	Yes (mild)	No	No	No	No	No	No	8
T108	48	Married	Tertiary	Trader	18	4	3	No		Yes	No	Yes	No	No	No	No	No	No	No	Yes (severe)	yes (mild)	No	No	No	yes (mild)	no	no	no	5
T109	43	Widowed	Secondary	Trader	12	1	1	Yes	39	No	Yes	No	No	yes	No	No	No	No	No	Yes (severe)	No	No	No	Yes (Moderate)	No	No	No	No	5
T110	55	Divorced	Tertiary	designer	12	2	2	Yes	48	No	No	Yes	No	No	No	No	No	No	No	Yes (severe)	Yes (mild)	Yes (moderate)	Yes (mild)	No	No	No	Yes (mild)	No	8
T111	35	Married	Secondary	Business	18	1	1	No		Yes	No	Yes	No	yes	No	No	Yes (moderate)	No	No	Yes (moderate)	Yes (very severe)	Yes (mild)	Yes (mild)	No	No	No	No	No	9
T112	38	Single	Secondary	site mgr	17	1	3	No		No	Yes	Yes	No	No	No	No	No	No	No	Yes (mild)	Yes (mild)	Yes (mild)	No	No	No	No	No	No	3
T113	49	Married	Tertiary	Self Employed	15	5	3	No		No	Yes	Yes	No	No	No	No	No	No	No	No	No	No	yes (mild)	No	No	No	No	Yes	1
T114	55	Married	Secondary	Trader	15	3	2	Yes	53	yes	Yes	Yes	No	yes	Yes	No	No	No	No	Yes (mild)	No	No	No	Yes (Moderate)	No	No	No	Yes	5
T115	36	Married	Secondary	kfc	13	3	4	No		Yes	No	Yes	No	No	No	No	No	No	No	No	No	No	No	No	Yes (moderate)	No	No	No	2
T116	36	Married	Secondary	Civil Servant	15	3	1	No		No	Yes	Yes	No	No	No	No	No	No	yes (mild)	Yes (mild)	No	No	No	No	No	No	No	No	2
T117	40	Married	Tertiary	Trader	12	3	1	No		No	Yes	Yes	No	No	No	No	No	No	No	No	No	No	No	No	No	No	No	No	0
T118	42	Married	Tertiary	Business	15	2	2	No		No	Yes	No	No	No	No	No	No	No	No	Yes (moderate)	No	No	No	No	No	No	No	No	2
T119	53	Widowed	Secondary	Trader	14	3	2	Yes	40	Yes	Yes	No	No	No	No	No	No	No	No	No	No	No	No	No	No	No	No	No	0
T120	52	Married	Tertiary	Trader	16	3	2	Yes	43	No	Yes	No	No	yes	No	No	Yes (mild)	No	Yes (mild)	Yes (moderate)	Yes (moderate)	Yes (moderate)	Yes (moderate)	no	no	no	No	No	9
T121	38	Single	Tertiary	Self Employed	14	0	1	No		Yes	Yes	Yes	No	No	No	No	Yes (mild)	No	No	No	Yes (mild)	Yes (mild)	Yes (mild)	Yes (Moderate)	Yes (mild)	No	No	No	7
T122	39	Married	Secondary	Trader	14	2	2	No		No	Yes	Yes	No	No	No	No	Yes (mild)	No	No	No	No	No	No	No	No	No	No	No	2
T123	47	Widowed	Secondary	Civil Servant	12	4	2	No		Yes	Yes	No	No	yes	Yes	No	No	No	Yes (mild)	Yes (severe)	Yes (moderate)	yes (very severe)	yes (mild)	Yes (Moderate)	No	No	Yes (mild)	No	15
T124	45	Separated	Tertiary	Trader	13	2	4	No		No	Yes	Yes	No	No	Yes	No	No	Yes (mild)	No	Yes (mild)	Yes (mild)	No	No	No	No	No	No	No	3
T125	46	Married	Secondary	Trader	13	5	5	No		Yes	Yes	Yes	No	No	No	No	No	No	No	No	No	No	Yes (mild)	No	Yes (moderate)	No	No	No	3
T126	59	Widowed	Tertiary	Teacher	Unk	0	2	Yes	47	No	Yes	No	No	No	No	No	No	Yes (mild)	No	No	No	No	Yes (mild)	No	No	No	No	No	1
T127	60	Married	Tertiary	Self Employed	14	5	1	Yes	56	Yes	Yes	No	No	No	No	No	No	No	No	Yes (mild)	No	Yes (mild)	No	No	No	No	No	No	2
T128	42	Married	Tertiary	Clearing Agent	16	2	1	No		No	No	Yes	No	Yes	No	No	No	Yes (mild)	No	No	No	No	No	Yes (Moderate)	No	No	No	No	2
T129	50	Married	Tertiary	Trader	18	5	3	Yes	48	No	Yes	Yes	No	No	No	No	No	No	No	Yes (mild)	No	No	No	No	No	No	No	No	1
T130	51	Widowed	Tertiary	Trader	16	3	5	No		Yes	Yes	Yes	No	No	No	No	No	No	No	No	No	No	No	No	No	No	Yes (moderate)	No	2
T131	50	Divorced	Secondary	Clergy	16	2	3	Yes	49	No	Yes	No	No	No	Yes	No	No	No	No	Yes (moderate)	No	No	No	No	No	Yes (mild)	No	No	2
T132	40	Married	Tertiary	Trader	Unk	3	1	No		No	No	Yes	No	Yes	No	No	No	Yes (mild)	No	Yes (mild)	Yes (mild)	Yes (moderate)	No	No	No	No	Yes (mild)	No	6
T133	45	Married	Secondary	Cleaner	13	0	0	No		No	No	No	No	No	No	No	No	No	No	Yes (mild)	No	No	No	No	No	No	No	No	1
T134	41	Married	Tertiary	Teacher	13	2	1	Yes	40	No	No	Yes	No	No	No	No	No	No	No	Yes (moderate)	No	No	Yes (mild)	No	Yes (mild)	No	Yes (mild)	Yes	5
T135	43	Separated	Tertiary	Self Employed	Unk	0	0	No		No	No	No	No	No	No	No	No	No	No	No	No	No	No	Yes (mild)	No	No	Yes (mild)	No	2
T136	32	Single	Secondary	Trader	Unk	0	Unk	No		No	Yes	Yes	No	No	No	No	No	No	No	No	No	No	No	No	No	No	No	No	0
T137	48	Widowed	No Formal	Trader	15	3	1	No		No	Yes	No	No	No	No	No	No	No	No	No	No	No	No	No	No	No	No	No	0
T138	41	Married	Secondary	Business	14	4	3	No		No	No	Yes	No	No	No	No	No	No	No	Yes (mild)	No	No	No	No	No	No	No	No	1
T139	47	Married	Tertiary	Trader	16	1	2	Yes	42	No	Yes	Yes	No	Yes	No	No	No	No	No	Yes (moderate)	No	No	No	No	No	No	Yes (moderate)	Yes	4
T140	48	Single	Tertiary	Self Employed	11	0	2	No		No	No	No	No	No	Yes	No	No	No	No	No	No	No	No	No	No	No	Yes (mild)	No	1
T141	42	Married	Tertiary	Self Employed	16	0	Unk	No		No	Yes	Yes	No	No	No	No	No	No	No	Yes (moderate)	No	No	No	No	No	No	Yes (mild)	No	3
T142	43	Married	Primary	Self Employed	16	4	2	No		No	No	Yes	No	No	No	No	No	No	No	No	Yes (mild)	Yes (mild)	No	No	No	No	No	No	2
T143	39	Separated	No Formal	Farmer	13	2	2	No		No	No	No	No	Yes	No	No	No	No	No	Yes (mild)	No	No	No	Yes (mild)	Yes (mild)	No	No	No	3
T144	44	Married	Tertiary	Business	11	2	4	No		Yes	No	Yes	No	No	No	No	No	No	No	Yes (severe)	No	Yes (mild)	Yes (moderate)	No	No	No	No	No	6
T145	56	Widowed	Secondary	Trader	13	4	4	Yes	48	No	Yes	No	No	No	Yes	No	No	No	Yes (moderate)	Yes (mild)	Yes (very severe)	No	No	No	No	No	No	No	7
T146	50	Widowed	Secondary	Trader	15	4	1	Yes	47	Yes	Yes	Yes	No	No	Yes	Yes	No	No	No	No	No	Yes (mild)	No	Yes (mild)	No	No	No	No	2
T147	36	Married	Tertiary	Human Resources	13	0	3	No		No	No	Yes	No	No	No	No	No	No	No	Yes (moderate)	No	No	No	No	Yes (severe)	No	No	Yes	5
T148	42	Divorced	Tertiary	Trader	13	2	2	Yes	41	No	Yes	Yes	No	No	Yes	No	No	No	No	Yes (moderate)	No	No	No	Yes (mild)	No	No	No	No	3
T149	54	Married	Secondary	Trader	18	1	1	Yes	48	No	No	Yes	No	No	No	No	Yes (severe)	No	No	Yes (mild)	No	Yes (mild)	Yes (mild)	No	No	No	No	No	6
T150	59	Widowed	Secondary	Hawking	unk	1	2	Yes	55	No	No	No	No	No	No	No	No	No	No	Yes (mild)	Yes (mild)	No	No	Yes (Moderate)	No	No	No	No	3
T151	42	Married	Secondary	Trader	13	5	Unk	No		Yes	Yes	Yes	No	No	No	No	No	No	No	Yes (mild)	No	No	No	Yes (mild)	No	No	No	No	1
T152	55	Married	Secondary	Police woman	17	4	2	Yes	47	Yes	Yes	No	No	No	Yes	No	Yes (moderate)	No	No	Yes (moderate)	No	No	No	No	No	No	No	No	4
T153	50	Married	Tertiary	Self Employed	12	2	4	Yes	49	Yes	Yes	Yes	No	No	No	No	Yes (moderate)	No	Yes (mild)	Yes (mild)	No	No	No	No	No	No	Yes (moderate)	No	6
T154	50	Married	Primary	Hawking	12	7	3	No		No	No	No	No	No	Yes	No	Yes (moderate)	Yes (severe)	No	Yes (severe)	No	No	No	Yes (Moderate)	No	No	No	No	10
T155	38	Married	Tertiary	Business	15	2	3	No		No	Yes	Yes	No	No	No	No	No	No	No	Yes (moderate)	No	No	No	Yes (Moderate)	Yes (mild)	No	No	No	5
T156	39	Married	Secondary	Trader	14	3	6	No		Yes	Yes	Yes	No	No	No	No	No	Yes (severe)	No	No	Yes (severe)	Yes (severe)	Yes (mild)	No	No	No	No	No	10
T157	57	Widowed	Secondary	Trader	Unk	3	Unk	Yes	50	No	No	No	No	No	Yes	No	No	No	No	Yes (mild)	No	Yes (mild)	No	Yes (mild)	No	No	No	No	3
T158	45	Married	Tertiary	Business	17	1	3	No		No	No	Yes	No	No	No	No	No	No	No	No	No	No	No	No	Yes (moderate)	No	No	No	2
T159	50	Married	Primary	Trader	Unk	1	1	Yes	50	Yes	No	Yes	No	No	No	No	No	No	No	Yes (mild)	No	No	No	No	Yes (moderate)	No	No	No	3
T160	39	Married	Tertiary	Trader	16	3	3	No		Yes	Yes	Yes	No	No	No	No	No	No	No	No	No	No	No	No	No	No	No	No	2
T161	50	Divorced	Tertiary	Teacher	15	0	5	Yes	47	No	No	No	No	No	No	No	No	No	No	No	No	No	No	No	No	No	No	No	1
T162	49	Married	Secondary	Trader	Unk	3	1	Yes	49	No	Yes	Yes	No	No	No	No	No	No	No	No	No	No	Yes (mild)	No	No	No	No	No	1
T163	46	Widowed	Tertiary	Marketer	13	1	Unk	Yes	46	No	Yes	No	No	yes	No	No	Yes (moderate)	No	No	No	No	No	Yes (mild)	No	No	No	No	No	3
T164	41	Widowed	Secondary	Unemployed	Unk	4	1	No		Yes	No	No	No	No	Yes	No	No	No	No	No	No	Yes (mild)	No	No	No	No	No	No	1
T165	42	Single	Tertiary	Trader	13	3	1	No		No	Yes	No	No	No	No	No	No	No	No	Yes (moderate)	No	No	No	Yes (mild)	Yes (moderate)	No	No	No	5
T166	53	Married	Tertiary	Trader	12	3	Unk	Yes	49	No	Yes	Yes	No	No	No	No	Yes (mild)	No	No	Yes (moderate)	No	No	No	No	No	No	Yes (mild)	No	4
T167	46	Married	Tertiary	Self Employed	13	0	2	No		Yes	Yes	Yes	No	Yes	Yes	No	No	No	Yes (moderate)	Yes (moderate)	Yes (severe)	Yes (mild)	Yes (severe)	Yes (Moderate)	No	No	No	No	14
T168	39	Married	Secondary	Hairdresser	10	2	5	No		No	No	Yes	No	No	No	No	No	No	No	Yes (mild)	No	No	No	No	No	No	No	No	1
T169	43	Married	Primary	Hairdresser	15	3	10	No		Yes	Yes	Yes	Yes	Yes	No	No	No	No	No	Yes (mild)	No	No	No	No	No	No	No	No	1
T170	52	Widowed	Tertiary	Civil Servant	Unk	1	6	Yes	46	Yes	No	Yes	No	No	Yes	No	No	No	No	Yes (mild)	No	No	No	No	No	No	No	No	1
T171	40	Married	Secondary	HouseWife	13	0	1	No		No	No	No	No	No	No	No	No	No	No	Yes (moderate)	No	No	No	No	No	No	No	No	2
T172	36	Married	Tertiary	Teacher	14	0	7	No		Yes	No	Yes	No	No	No	No	No	No	No	No	No	No	No	Yes (mild)	No	No	yes (mild)	No	2
T173	40	Married	Secondary	Farmer	15	4	3	No		Yes	Yes	Yes	No	No	No	No	yes (moderate)	Yes (moderate)	yes (mild)	yes (mild)	yes (mild)	yes (mild)	yes (moderate)	Yes (mild)	No	No	yes (mild)	No	12
T174	37	Separated	Tertiary	Chef	17	5	1	No		Yes	No	No	No	No	No	No	No	No	No	Yes (mild)	Yes (mild)	Yes (severe)	Yes (moderate)	No	No	No	No	No	8
T175	48	Married	Tertiary	Chemist	13	3	1	Yes	48	Yes	No	Yes	No	No	No	No	No	No	No	No	No	Yes (mild)	No	No	No	No	No	No	2
T176	43	Married	Tertiary	Self Employed	12	3	3	No		No	Yes	Yes	No	Yes	Yes	No	No	No	Yes (mild)	Yes (moderate)	No	No	yes (mild)	Yes (mild)	No	No	No	No	5
T177	50	Divorced	Secondary	Self Employed	13	4	3	No		No	Yes	No	No	Yes	No	No	Yes (severe)	No	No	Yes (moderate)	Yes (moderate)	Yes (moderate)	No	No	No	No	Yes (mild)	No	10
T178	48	Single	Tertiary	Trader	15	1	6	No		No	Yes	Yes	No	No	Yes	No	No	Yes (moderate)	Yes (mild)	Yes (mild)	Yes (mild)	Yes (mild)	Yes (moderate)	No	No	No	No	Yes	8
T179	37	Married	Primary	Cleaner	13	5	4	No		No	Yes	Yes	No	No	No	No	No	No	No	No	No	No	Yes (mild)	No	No	No	No	No	1
T180	44	Married	Secondary	company	12	3	1	No		No	Yes	No	No	No	No	No	No	No	No	No	Yes (moderate)	Yes (mild)	Yes (moderate)	Yes (mild)	No	No	No	Yes	6
T181	47	Married	Primary	Trader	17	4	1	No		No	Yes	Yes	No	No	No	No	Yes (mild)	No	No	No	No	No	No	No	No	No	No	No	1
T182	39	Married	Tertiary	Self Employed	16	4	Unk	No		No	Yes	Yes	No	Yes	No	No	No	No	Yes (mild)	No	No	No	No	No	No	No	No	No	1
T183	35	Married	Secondary	Self Employed	19	0	2	No		Yes	No	Yes	No	No	No	No	Yes (mild)	No	No	Yes (mild)	No	No	Yes (mild)	No	No	No	Yes (mild)	Yes	5
T184	48	Married	Secondary	Unemployed	13	2	1	Yes	37	No	Yes	Yes	No	No	No	No	No	No	No	Yes (severe)	No	No	No	No	No	No	No	Yes	3
T185	52	Married	Tertiary	Self Employed	12	4	2	Yes	47	No	No	Yes	No	No	No	No	No	No	No	No	No	No	No	No	Yes (mild)	No	No	No	1
T186	47	Married	Secondary	Trader	Unk	4	1	No		Yes	Yes	Yes	No	No	No	No	No	No	No	Yes (mild)	No	No	No	No	No	No	Yes (mild)	No	2
T187	47	Separated	Tertiary	Self Employed	15	1	1	No		No	Yes	Yes	No	No	No	No	No	No	No	Yes (mild)	Yes (mild)	Yes (mild)	No	No	No	No	No	Yes	3
T188	45	Married	Secondary	Trader	18	3	3	No		Yes	No	Yes	No	No	No	No	No	No	No	No	No	No	Yes (mild)	No	No	No	No	No	1
T189	53	Married	No Formal	Trader	18	3	3	Yes	52	No	Yes	No	No	No	No	No	No	Yes (moderate)	No	No	No	No	No	No	No	No	No	No	3
T190	60	Married	Primary	Trader	15	5	4	Yes	53	No	No	Yes	No	No	Yes	Yes	No	No	No	Yes (mild)	Yes (moderate)	No	No	No	No	No	No	No	5
T191	45	Married	Secondary	Artisan	15	2	4	No		No	Yes	Yes	No	yes	No	No	No	No	No	Yes (mild)	No	No	No	No	yes (mild)	No	No	No	2
T192	41	Married	Tertiary	skin therapist	Unk	3	Unk	No		Yes	Yes	Yes	No	No	No	No	No	No	No	No	No	No	No	Yes (mild)	No	No	No	No	1
T193	56	Widowed	Secondary	Catering	17	1	1	Yes	52	Yes	Yes	No	No	No	No	No	No	No	No	No	No	Yes (mild)	Yes (mild)	No	No	No	No	No	2
T194	37	Widowed	Secondary	Clergy	14	1	4	Yes	34	No	Yes	No	No	No	No	No	Yes (mild)	No	Yes (severe)	No	Yes (mild)	Yes (mild)	Yes (mild)	No	No	No	No	No	7
T195	49	Married	Tertiary	Civil Servant	16	3	1	No		No	Yes	Yes	No	No	No	No	No	No	No	Yes (severe)	No	No	No	No	No	No	No	No	3
T196	40	Single	Primary	Self Employed	Unk	1	2	Yes	40	Yes	Yes	No	No	No	No	No	No	No	Yes (mild)	Yes (moderate)	No	No	No	No	No	No	No	No	3
T197	60	Widowed	Secondary	Catering	15	3	3	Yes	51	Yes	No	No	No	yes	Yes	No	No	Yes (mild)	Yes (moderate)	Yes (mild)	Yes (moderate)	No	No	No	No	No	No	No	6
T198	53	Widowed	Secondary	Trader	Unk	3	1	Yes	52	Yes	No	No	No	No	No	No	Yes (mild)	No	Yes (mild)	No	No	No	No	No	No	No	No	No	2
T199	36	Married	Tertiary	Fashion Designer	16	2	1	No		No	No	Yes	No	No	No	No	No	No	No	No	Yes (moderate)	No	Yes (moderate)	No	No	No	No	No	4
T200	46	Widowed	Tertiary	Teacher	12	3	3	No		Yes	No	No	No	Yes	Yes	No	Yes (moderate)	No	No	Yes (mild)	yes (mild)	No	No	Yes (severe)	No	No	No	No	7
T201	37	Single	Secondary	Trader	18	2	2	No		No	Yes	Yes	No	Yes	No	No	No	No	No	Yes (mild)	yes (mild)	yes (very severe)	No	No	No	No	Yes (mild)	No	7
T202	52	Divorced	Secondary	Massuese	15	4	2	Yes	52	No	Yes	No	Yes	Yes	No	No	No	No	No	Yes (mild)	No	No	No	No	No	No	No	Yes	1
T203	43	Married	Secondary	Trader	15	4	1	Yes	40	No	Yes	No	No	Yes	No	No	Yes (very severe)	No	yes (mild)	No	No	No	Yes (mild)	No	No	No	No	No	6
T204	50	Married	Secondary	Trader	16	4	1	No		No	Yes	Yes	No	No	No	No	No	No	No	No	No	No	No	No	No	No	No	No	0
T205	45	Widowed	Secondary	Civil Servant	19	2	1	No		No	No	No	No	No	No	No	No	No	No	Yes (mild)	yes (mild)	No	Yes (mild)	Yes (mild)	No	Yes (mild)	No	No	5
T206	59	Widowed	Primary	Trader	Unk	0	2	Yes	45	No	No	No	No	Yes	No	No	No	No	No	Yes (mild)	No	No	No	Yes (mild)	No	No	No	No	2
T207	47	Married	Secondary	Catering	17	5	1	No		Yes	No	Yes	No	No	No	No	No	No	No	Yes (severe)	No	No	No	Yes (Moderate)	No	no	no	Yes	5
T208	44	Married	Secondary	Fashion Designer	13	1	4	No		Yes	No	Yes	No	Yes	Yes	No	No	Yes (mild)	yes (mild)	Yes (moderate)	No	No	Yes (moderate)	Yes (Moderate)	No	Yes (moderate)	Yes (mild)	No	11
T209	65	Widowed	Secondary	Unemployed	15	6	1	Yes	52	Yes	No	No	No	No	No	No	No	No	No	Yes (mild)	No	No	No	No	No	No	Yes (mild)	No	2
T210	47	Single	Tertiary	Nurse	15	1	3	No		Yes	Yes	Yes	No	No	No	No	No	No	No	No	yes (mild)	No	Yes (mild)	No	No	No	No	Yes	1
T211	50	Married	Secondary	Trader	Unk	2	1	No		No	No	No	No	No	No	No	No	No	No	No	yes (mild)	No	No	No	No	No	No	No	1
T212	70	Single	Secondary	Nanny	Unk	1	1	Yes	59	No	No	No	No	No	No	No	No	No	No	Yes (mild)	No	No	No	No	No	No	No	No	1
T213	40	Widowed	Tertiary	Self Employed	12	2	6	No		No	Yes	Yes	No	yes	No	No	No	No	No	No	No	Yes (mild)	No	No	No	No	No	No	1
T214	54	Married	Tertiary	Trader	14	0	2	Yes	53	No	No	No	No	No	No	No	No	No	yes (mild)	No	No	No	No	No	No	No	No	Yes	1
T215	62	Widowed	Secondary	Retired	15	4	2	Yes	53	No	No	No	No	No	Yes	No	No	No	No	No	No	No	No	Yes (Moderate)	No	No	No	No	2
T216	47	Married	Tertiary	Teacher	16	4	1	No		No	Yes	Yes	No	No	No	No	No	No	yes (mild)	No	No	No	No	No	No	No	No	No	1
T217	48	Widowed	Secondary	Trader	13	1	2	Yes	41	Yes	No	No	No	No	No	No	Yes (mild)	No	No	Yes (mild)	Yes (mild)	Yes (moderate)	No	Yes (mild)	No	No	No	No	6
T218	44	Married	Tertiary	Teacher	12	1	2	No		No	Yes	Yes	No	yes	No	No	No	No	No	Yes (moderate)	No	Yes (moderate)	Yes (mild)	No	No	No	No	No	5
T219	35	Married	Tertiary	Administration	13	0	2	No		Yes	Yes	Yes	No	No	No	No	No	No	Yes (moderate)	No	Yes (mild)	Yes (mild)	No	Yes (Moderate)	No	No	Yes (mild)	Yes	7
T220	53	Married	Secondary	Fashion Designer	12	2	3	Yes	52	Yes	Yes	Yes	No	No	Yes	No	Yes (mild)	No	No	Yes (mild)	Yes (mild)	Yes (mild)	Yes (mild)	Yes (Moderate)	no	Yes (moderate)	No	No	13
T221	55	Widowed	Tertiary	Nanny	18	2	2	Yes	48	No	Yes	No	No	No	No	No	Yes (severe)	Yes (mild)	No	Yes (mild)	Yes (mild)	No	No	No	No	No	No	No	6
T222	40	Married	Secondary	Trader	Unk	4	2	No		Yes	Yes	Yes	No	No	No	No	No	No	No	No	No	No	No	No	No	No	No	No	0
T223	45	Single	Secondary	Trader	Unk	0	2	Yes	40	No	Yes	No	No	No	Yes	No	Yes (mild)	No	Yes (moderate)	No	Yes (moderate)	Yes (mild)	Yes (moderate)	Yes (mild)	No	No	No	No	8
T224	38	Married	Secondary	Trader	Unk	3	5	No		No	No	Yes	No	yes	No	No	No	Yes (mild)	No	No	No	Yes (mild)	No	No	No	No	Yes (severe)	No	5
T225	40	Married	Secondary	Trader	17	3	3	No		No	No	Yes	No	No	No	No	No	No	No	Yes (moderate)	No	No	No	No	No	No	No	No	2
T226	43	Married	Secondary	Trader	Unk	2	1	No		Yes	Yes	Yes	No	No	No	No	No	No	No	Yes (moderate)	No	Yes (mild)	Yes (mild)	No	No	No	No	No	4
T227	38	Married	Secondary	Trader	unk	3	5	No		No	No	Yes	No	Yes	No	No	No	Yes (mild)	No	No	No	Yes (mild)	No	No	No	No	Yes (mild)	No	5
T228	40	Married	Tertiary	Influencer	15	3	2	No		Yes	Yes	Yes	No	No	Yes	No	No	Yes (moderate)	No	No	No	No	No	Yes (mild)	No	No	No	Yes	3
T229	47	Single	Tertiary	Trader	14	0	3	No		Yes	Yes	No	No	No	Yes	No	No	No	No	Yes (mild)	No	No	No	No	No	No	No	No	1
T230	56	Separated	Tertiary	Trader	11	1	1	Yes	54	Yes	No	No	No	No	Yes	No	Yes (moderate)	No	No	Yes (moderate)	No	No	No	No	No	No	No	No	4
T231	45	Widowed	Secondary	Trader	16	3	7	No		No	Yes	Yes	No	Yes	No	No	No	No	No	Yes (severe)	No	No	No	No	No	No	Yes (very severe)	No	7
T232	44	Married	Tertiary	Business	14	3	3	No		No	Yes	Yes	No	Yes	No	No	No	No	No	No	No	No	No	No	No	No	No	No	0
T233	39	Married	Secondary	Unemployed	16	2	2	No		No	No	Yes	No	No	No	No	No	Yes (mild)	No	No	No	No	No	Yes (Moderate)	No	No	No	No	3
T234	56	Widowed	Primary	Trader	14	4	1	Yes	45	No	No	No	No	Yes	No	No	No	No	No	No	No	No	No	No	No	No	No	No	0
T235	44	Married	No Formal	Trader	unk	4	1	No		No	No	Yes	No	No	No	No	No	No	No	Yes (moderate)	No	No	No	No	No	No	No	No	2
T236	40	Married	Tertiary	Trader	15	2	1	No		No	No	No	No	No	No	No	No	No	No	Yes (mild)	Yes (mild)	No	Yes (mild)	Yes (Moderate)	No	No	Yes (severe)	No	8
T237	58	Widowed	Tertiary	Teacher	unk	2	1	Yes	45	No	No	No	No	Yes	Yes	No	Yes (mild)	No	No	Yes (moderate)	No	No	No	No	No	No	No	No	3
T238	46	Married	Secondary	Trader	15	4	3	No		No	Yes	Yes	No	No	No	No	No	No	No	No	No	No	No	No	No	No	No	No	0
T239	39	Married	Tertiary	Fashion Designer	15	1	5	No		No	Yes	Yes	No	No	No	No	Yes (mild)	No	Yes (severe)	No	No	No	No	No	Yes (mild)	No	Yes (moderate)	Yes	7
T240	54	Widowed	Primary	Nurse	12	5	1	Yes	46	No	No	No	No	No	No	No	No	No	No	No	No	No	No	No	No	No	No	No	0
T241	52	Widowed	Secondary	Trader	12	7	1	Yes	48	No	No	No	No	No	No	No	No	No	No	Yes (moderate)	No	No	No	No	No	No	No	No	2
T242	61	Married	Secondary	HouseWife	13	3	1	Yes	43	Yes	Yes	No	No	No	No	No	Yes (severe)	Yes (mild)	No	Yes (very severe)	No	No	No	No	No	No	No	No	5
T243	35	Married	Secondary	Trader	16	3	Unk	No		Yes	Yes	Yes	No	yes	Yes	No	No	No	No	Yes (mild)	Yes (mild)	No	No	Yes (Moderate)	No	No	No	No	6
T244	59	Widowed	Secondary	Trader	unk	4	1	Yes	39	No	No	No	No	Yes	Yes	No	No	No	No	Yes (severe)	No	No	No	Yes (mild)	No	No	No	No	2
T245	40	Single	Secondary	Self Employed	17	1	8	No		No	Yes	Yes	No	Yes	No	No	No	No	No	Yes (mild)	No	No	No	Yes (mild)	No	No	No	No	7
T246	37	Married	Tertiary	Trader	13	4	1	Yes	44	No	Yes	No	No	Yes	Yes	No	No	No	No	Yes (mild)	No	Yes (severe)	No	Yes (mild)	No	No	Yes (mild)	No	9
T247	44	Married	Tertiary	Self Employed	14	3	2	Yes	45	Yes	Yes	No	No	Yes	No	No	No	No	No	Yes (mild)	No	No	No	No	Yes (mild)	No	No	No	4
T248	47	Married	Secondary	Hairdresser	15	3	3	Yes	57	No	Yes	Yes	No	No	No	No	No	No	Yes (moderate)	Yes (moderate)	No	No	Yes (mild)	No	No	Yes (mild)	No	No	6
T249	39	Married	Primary	Hairdresser	17	0	1	No		Yes	Yes	No	No	No	No	No	No	No	No	Yes (very severe)	No	Yes (mild)	No	No	no	No	Yes (mild)	No	2
T250	35	Divorced	Tertiary	Civil Servant	13	2	1	Yes	46	No	No	No	No	Yes	No	No	No	No	No	No	No	No	Yes (mild)	No	No	No	No	No	4
T251	48	Divorced	Secondary	HouseWife	12	3	3	Yes	52	Yes	No	No	No	No	No	No	No	No	No	No	No	No	No	No	No	No	No	No	4
T252	52	Married	Tertiary	Teacher	13	1	2	Yes	51	No	No	Yes	No	Yes	No	No	No	No	No	Yes (very severe)	No	No	No	No	No	No	No	No	7
T253	47	Married	Secondary	Farmer	15	0	2	Yes	47	Yes	No	No	No	No	No	No	No	Yes (moderate)	No	No	No	No	Yes (moderate)	No	No	No	No	No	8
T254	47	Married	Tertiary	Chef	13	0	1	No		No	Yes	Yes	No	No	Yes	No	No	Yes (mild)	No	Yes (mild)	Yes (severe)	No	No	No	No	No	No	No	9
T255	45	Married	Tertiary	Chemist	12	4	1	Yes	48	Yes	Yes	No	No	No	No	No	Yes (mild)	No	No	No	No	No	No	No	No	No	No	No	4
T256	53	Married	Tertiary	Self Employed	17	5	1	Yes	55	No	Yes	No	No	No	No	No	No	No	No	Yes (moderate)	No	No	No	No	No	No	No	No	9
T257	60	Single	Secondary	Self Employed	16	3	2	Yes	49	No	Yes	Yes	No	yes	No	No	No	No	No	Yes (mild)	No	No	No	No	No	No	No	No	7
T258	45	Married	Tertiary	Trader	19	3	1	Yes	50	Yes	No	No	No	No	No	No	No	No	No	Yes (mild)	No	Yes (mild)	No	No	No	No	No	No	3
T259	41	Married	Primary	Cleaner	13	4	4	No		No	No	No	No	No	No	Yes	Yes (mild)	Yes (severe)	Yes (moderate)	No	No	No	No	No	No	No	No	No	3
T260	56	Married	Secondary	company	12	1	1	Yes	47	No	No	Yes	No	No	No	No	No	No	No	No	yes (mild)	No	No	No	No	No	No	No	6
T261	37	Married	Primary	Trader	15	5	3	Yes	48	No	No	Yes	No	No	Yes	No	Yes (moderate)	Yes (mild)	No	Yes (mild)	Yes (mild)	No	No	No	No	No	No	No	2
T262	49	Married	Tertiary	Self Employed	13	3	1	Yes	50	No	No	No	No	yes	No	No	No	No	No	No	No	No	No	No	No	No	No	No	4
T263	40	Married	Secondary	Self Employed	14	4	1	Yes	47	No	Yes	Yes	No	No	No	No	No	Yes (mild)	No	No	No	No	Yes (mild)	No	No	No	No	No	7
T264	60	Single	Secondary	Unemployed	15	4	6	No		No	No	No	No	No	No	No	Yes (very severe)	No	No	No	Yes (moderate)	No	No	No	No	No	Yes (mild)	No	7
T265	53	Married	Tertiary	Self Employed	17	0	2	Yes	44	No	No	No	No	No	No	No	No	No	No	No	Yes (mild)	No	Yes (mild)	No	No	No	No	No	0
T266	36	Single	Secondary	Trader	unk	2	2	Yes	47	No	Yes	Yes	No	No	Yes	No	No	No	No	Yes (mild)	No	No	No	Yes (severe)	No	No	No	No	6
T267	46	Married	Tertiary	Self Employed	12	4	1	Yes	48	No	No	No	No	No	No	No	No	Yes (mild)	Yes (mild)	Yes (mild)	Yes (moderate)	No	No	No	No	No	No	no	0
T268	37	Married	Secondary	Trader	13	4	2	No	45	No	No	No	No	yes	No	No	No	Yes (mild)	No	No	No	No	Yes (moderate)	No	Yes (mild)	No	No	No	5
T269	52	Married	No Formal	Trader	14	1	2	Yes	47	No	Yes	Yes	No	No	Yes	No	No	No	No	Yes (mild)	No	No	No	No	No	No	No	No	2
T270	43	Married	Primary	Trader	13	3	2	Yes	47	No	No	No	No	No	No	No	No	No	No	Yes (moderate)	No	No	No	No	No	No	no	No	5
T271	50	Single	Secondary	Artisan	12	3	3	Yes	43	No	Yes	Yes	No	Yes	No	No	No	No	No	Yes (moderate)	No	No	No	Yes (mild)	No	No	Yes (mild)	No	11
T272	45	Widowed	Tertiary	skin therapist	17	5	2	Yes	47	Yes	Yes	Yes	No	No	No	No	No	Yes (mild)	No	No	No	Yes (mild)	Yes (mild)	Yes (mild)	No	No	Yes (mild)	Yes	2
T273	59	Married	Secondary	Catering	16	2	2	No		No	Yes	Yes	No	No	No	No	No	No	No	Yes (mild)	No	No	No	Yes (Moderate)	No	No	No	Yes	0
T274	47	Married	Secondary	Clergy	19	3	2	Yes	50	Yes	Yes	No	No	No	Yes	No	No	No	No	No	Yes (mild)	No	Yes (mild)	Yes (Moderate)	No	No	No	No	0
T275	44	Divorced	Tertiary	Civil Servant	13	1	5	Yes	47	No	Yes	Yes	No	Yes	Yes	No	No	Yes (severe)	No	No	No	Yes (moderate)	No	No	No	No	No	No	1
T276	65	Widowed	Primary	Self Employed	12	1	3	Yes	47	No	Yes	No	No	Yes	Yes	No	No	No	No	No	No	Yes (mild)	No	No	No	No	No	No	0
T277	47	Married	Secondary	Catering	Unk	3	1	Yes	44	No	No	Yes	No	No	No	No	No	No	No	Yes (mild)	Yes (moderate)	Yes (mild)	Yes (moderate)	No	No	No	No	No	1
T278	50	Single	Secondary	Trader	13	1	1	No		No	No	Yes	No	Yes	No	No	Yes (mild)	No	Yes (mild)	Yes (mild)	No	No	No	No	No	No	No	No	3
T279	70	Married	Tertiary	Fashion Designer	14	3	2	Yes	47	Yes	Yes	Yes	No	No	No	No	No	No	No	No	No	No	No	No	Yes (mild)	No	No	No	1
T280	40	Married	Tertiary	Teacher	15	3	3	Yes	46	Yes	No	Yes	No	No	No	No	No	No	No	Yes (moderate)	No	No	No	No	No	No	Yes (mild)	No	6
T281	54	Married	Secondary	Trader	17	2	1	No		Yes	Yes	Yes	No	Yes	No	No	Yes (mild)	No	No	Yes (mild)	Yes (mild)	No	No	No	No	No	No	No	5
T282	62	Married	Secondary	Massuese	13	3	1	Yes	48	No	Yes	No	No	No	No	No	Yes (severe)	No	No	No	No	No	No	No	No	No	No	No	7
T283	47	Single	Secondary	Trader	12	2	3	No		No	No	No	No	No	Yes	No	No	No	No	Yes (mild)	No	No	No	Yes (mild)	No	Yes (mild)	Yes (mild)	No	12
T284	48	Married	Secondary	Trader	13	4	2	Yes	48	Yes	Yes	Yes	No	No	No	No	Yes (mild)	No	No	Yes (mild)	Yes (moderate)	No	No	No	No	No	No	No	3
T285	44	Married	Secondary	Civil Servant	15	4	2	Yes	46	No	Yes	Yes	No	No	No	No	No	No	No	Yes (mild)	No	Yes (moderate)	No	Yes (Moderate)	No	No	No	No	3
T286	35	Single	Primary	Trader	13	4	1	Yes	45	No	No	Yes	No	No	No	No	No	No	No	Yes (severe)	Yes (moderate)	Yes (mild)	No	No	No	No	No	No	1
T287	53	Married	Secondary	Catering	12	2	1	No		Yes	No	No	No	yes	No	No	No	No	No	Yes (severe)	yes (mild)	Yes (severe)	Yes (mild)	No	No	No	No	No	2
T288	55	Widowed	Secondary	Fashion Designer	17	0	1	Yes	47	Yes	No	Yes	No	Yes	No	No	No	No	No	No	yes (mild)	No	No	No	Yes (mild)	No	No	No	2
T289	40	Single	Secondary	Unemployed	16	5	2	Yes	49	No	No	No	No	Yes	No	No	No	No	No	Yes (moderate)	No	No	Yes (mild)	No	No	No	No	No	1
T290	45	Widowed	Tertiary	Nurse	19	1	1	Yes	46	No	No	No	No	No	No	No	No	No	No	No	No	Yes (mild)	No	Yes (severe)	No	No	No	No	2
T291	38	Married	Secondary	Trader	13	6	4	Yes	46	No	Yes	Yes	No	Yes	Yes	No	Yes (moderate)	No	Yes (mild)	No	No	No	No	No	No	No	No	No	2
T292	40	Widowed	Secondary	Trader	Unk	1	1	No		Yes	Yes	Yes	No	No	No	No	No	Yes (mild)	Yes (moderate)	No	yes (mild)	No	Yes (moderate)	No	Yes (severe)	No	No	No	6
T293	43	Married	Tertiary	Self Employed	Unk	2	3	Yes	47	No	No	No	No	No	No	No	No	No	No	No	No	No	No	No	No	No	No	Yes	1
T294	38	Single	Tertiary	Hairdresser	13	1	1	Yes	48	No	No	No	No	No	No	No	No	Yes (mild)	No	No	No	No	No	Yes (mild)	No	No	No	No	5
T295	40	Married	Secondary	Hairdresser	14	2	1	Yes	47	Yes	Yes	No	No	Yes	No	No	No	No	No	No	No	No	No	No	No	No	No	No	2
T296	47	Widowed	Tertiary	Civil Servant	15	0	6	Yes	46	No	Yes	Yes	No	Yes	No	No	No	Yes (mild)	No	Yes (mild)	No	No	Yes (mild)	Yes (Moderate)	No	No	No	No	0
T297	56	Married	Secondary	HouseWife	16	4	2	Yes	47	Yes	No	No	No	No	No	No	No	No	No	Yes (mild)	No	No	No	No	No	No	No	No	0
T298	45	Married	Tertiary	Teacher	13	4	2	Yes	47	Yes	Yes	Yes	No	Yes	Yes	No	Yes (mild)	No	No	No	No	No	Yes (mild)	No	No	No	Yes (mild)	Yes	1
T299	44	Widowed	Tertiary	Farmer	12	1	1	Yes	48	No	Yes	No	No	No	No	No	No	No	No	Yes (moderate)	No	Yes (mild)	No	No	No	No	No	No	4
T300	39	Married	Secondary	Chef	13	1	2	Yes	50	Yes	Yes	No	No	No	No	No	Yes (mild)	Yes (mild)	No	Yes (mild)	No	No	No	No	Yes (mild)	No	No	No	1
T301	56	Widowed	Tertiary	Chemist	15	0	2	Yes	49	Yes	Yes	Yes	No	Yes	No	No	No	No	No	No	No	No	Yes (moderate)	Yes (mild)	No	No	No	No	3
T302	44	Single	Secondary	Self Employed	12	2	2	Yes	48	Yes	Yes	No	No	No	No	No	No	No	No	Yes (mild)	No	No	No	No	No	No	No	No	0
T303	40	Single	Secondary	Self Employed	12	2	3	Yes	47	Yes	No	No	No	No	Yes	No	Yes (severe)	No	Yes (moderate)	Yes (mild)	No	No	No	No	Yes (moderate)	No	No	No	3
T304	58	Married	Tertiary	Trader	17	4	2	Yes	46	No	No	No	No	No	No	No	No	No	No	Yes (mild)	Yes (mild)	No	No	No	Yes (moderate)	No	no	No	6
T305	46	Married	Tertiary	Cleaner	16	0	2	Yes	45	No	No	Yes	No	No	No	No	No	No	No	Yes (severe)	No	No	No	Yes (mild)	No	No	Yes (mild)	No	7
T306	39	Widowed	Secondary	company	19	3	2	Yes	47	No	No	No	No	No	Yes	No	No	No	No	Yes (severe)	Yes (mild)	No	No	No	No	No	Yes (mild)	Yes	0
T307	54	Married	Primary	Trader	13	3	5	Yes	48	No	Yes	Yes	No	yes	No	No	No	No	No	No	No	No	No	Yes (Moderate)	No	No	No	No	5
T308	52	Widowed	Tertiary	Self Employed	14	2	3	Yes	44	No	Yes	No	No	Yes	No	No	No	No	No	Yes (moderate)	No	No	No	No	No	No	No	No	3
T309	61	Married	Secondary	Self Employed	Unk	3	1	Yes	46	No	Yes	No	No	Yes	No	No	Yes (mild)	No	No	No	Yes (moderate)	No	No	No	No	No	No	No	6
T310	35	Widowed	Tertiary	Unemployed	16	3	1	Yes	46	No	Yes	Yes	No	No	No	No	No	No	No	No	No	No	No	No	Yes (moderate)	No	No	No	3
T311	59	Married	Secondary	Self Employed	13	0	1	Yes	48	Yes	No	No	No	Yes	Yes	No	Yes (mild)	No	Yes (mild)	No	No	No	Yes (mild)	No	No	No	No	No	0
T312	40	Married	Tertiary	Trader	12	1	3	Yes	49	No	No	No	No	No	Yes	No	No	No	No	No	No	No	No	No	No	No	No	No	4
T313	46	Divorced	Tertiary	Self Employed	13	3	5	Yes	51	Yes	No	Yes	No	No	Yes	No	No	No	No	No	Yes (mild)	Yes (mild)	Yes (mild)	No	No	No	No	No	6
T314	49	Widowed	Tertiary	Trader	15	3	3	Yes	49	No	No	Yes	No	No	No	No	Yes (severe)	No	No	Yes (mild)	No	No	No	No	No	No	Yes (mild)	No	9
T315	51	Married	Secondary	Trader	12	2	1	Yes	47	Yes	No	No	No	Yes	No	No	No	No	No	Yes (mild)	No	No	No	No	Yes (mild)	No	No	No	9
T316	44	Married	Tertiary	Trader	12	4	0	Yes	48	No	Yes	Yes	No	Yes	No	No	No	No	No	No	Yes (moderate)	Yes (moderate)	Yes (moderate)	Yes (mild)	No	No	No	No	8
T317	64	Married	Primary	Artisan	17	4	1	Yes	44	Yes	No	No	No	No	No	No	No	No	No	Yes (moderate)	No	Yes (mild)	No	No	No	No	Yes (mild)	No	9
T318	43	Widowed	Secondary	skin therapist	16	2	0	Yes	46	No	No	No	No	Yes	No	No	No	No	No	Yes (mild)	Yes (moderate)	No	No	Yes (Moderate)	No	Yes (mild)	No	No	7
T319	48	Married	Primary	Catering	19	2	Unk	Yes	46	Yes	Yes	Yes	No	No	No	No	No	No	No	No	yes (mild)	No	No	No	No	No	No	No	9
T320	44	Widowed	Tertiary	Clergy	13	4	1	Yes	48	No	No	No	No	No	Yes	No	No	No	No	Yes (mild)	yes (mild)	No	Yes (mild)	No	Yes (moderate)	No	No	No	10
T321	43	Married	Secondary	Civil Servant	14	1	3	Yes	49	Yes	No	No	No	Yes	No	No	No	No	No	Yes (mild)	No	No	No	No	No	No	No	No	9
T322	49	Single	Secondary	Self Employed	Unk	5	2	Yes	51	No	Yes	Yes	No	No	No	No	No	Yes (severe)	Yes (mild)	No	Yes (mild)	No	Yes (mild)	Yes (Moderate)	No	No	No	No	4
T323	53	Married	Tertiary	Catering	16	7	2	No		No	No	No	No	No	No	No	No	No	No	Yes (severe)	No	No	No	No	No	No	No	No	10
T324	52	Widowed	Secondary	Trader	13	3	3	Yes	47	Yes	Yes	Yes	No	No	No	No	No	Yes (severe)	No	Yes (severe)	No	No	No	No	Yes (mild)	No	No	No	5
T325	52	Married	Tertiary	Fashion Designer	12	3	2	Yes	48	No	Yes	Yes	No	No	No	No	No	No	No	No	Yes (moderate)	No	Yes (moderate)	No	No	No	No	No	6
T326	44	Married	Secondary	Teacher	13	4	2	Yes	44	No	Yes	Yes	No	No	No	No	No	No	No	Yes (moderate)	No	Yes (moderate)	No	No	No	No	No	No	8
T327	44	Widowed	No Formal	Trader	15	4	4	Yes	46	No	Yes	No	No	yes	No	No	Yes (mild)	No	No	No	No	Yes (mild)	No	Yes (mild)	No	No	No	No	9
T328	46	Married	Primary	Massuese	12	4	4	Yes	46	No	Yes	Yes	No	Yes	Yes	Yes	No	No	No	No	No	No	No	Yes (mild)	Yes (severe)	No	No	No	7
T329	43	Widowed	Secondary	Trader	12	2	1	Yes	48	No	Yes	No	No	Yes	No	No	No	No	No	No	Yes (mild)	No	No	Yes (Moderate)	No	No	No	no	5
T330	40	Single	Tertiary	Trader	17	2	4	Yes	49	No	No	Yes	No	No	No	No	No	No	No	Yes (moderate)	No	No	No	No	No	Yes (mild)	No	No	3
T331	46	Single	Secondary	Civil Servant	16	4	2	Yes	51	No	No	Yes	No	Yes	No	No	Yes (mild)	No	No	Yes (mild)	No	Yes (mild)	Yes (moderate)	No	Yes (mild)	No	No	No	8
T332	43	Married	Secondary	Trader	19	1	2	Yes	49	No	Yes	Yes	No	No	No	No	No	No	No	Yes (severe)	Yes (moderate)	No	No	No	No	No	Yes (mild)	No	9
T333	53	Married	Tertiary	Catering	13	5	2	Yes	47	No	No	Yes	No	No	No	No	Yes (moderate)	No	No	Yes (moderate)	No	No	No	No	No	Yes (mild)	No	No	5
T334	45	Widowed	Tertiary	Fashion Designer	14	7	1	Yes	48	No	Yes	Yes	No	No	No	No	No	No	No	No	Yes (moderate)	No	No	No	No	No	No	Yes	5
T335	43	Married	Tertiary	Unemployed	Unk	3	4	Yes	44	No	Yes	No	No	Yes	Yes	No	No	No	Yes (mild)	No	yes (mild)	No	Yes (mild)	No	No	No	No	Yes	4
T336	48	Widowed	Secondary	Nurse	12	3	1	Yes	46	No	No	No	No	Yes	No	No	Yes (very severe)	No	No	No	yes (mild)	No	No	No	Yes (mild)	No	No	No	6
T337	58	Married	Primary	Trader	12	5	3	Yes	46	No	Yes	Yes	No	No	No	No	No	No	Yes (mild)	Yes (mild)	Yes (severe)	No	Yes (mild)	No	No	No	No	No	5
T338	59	Widowed	Tertiary	Trader	17	4	1	Yes	48	Yes	Yes	Yes	No	Yes	No	No	No	No	No	No	No	No	No	Yes (mild)	No	No	no	No	3
T339	51	Married	Secondary	Self Employed	16	6	1	Yes	49	No	No	Yes	No	No	No	No	No	No	No	No	No	No	No	Yes (mild)	Yes (moderate)	No	Yes (mild)	No	6
T340	44	Married	Tertiary	Hairdresser	19	2	6	Yes	51	Yes	No	No	No	No	Yes	No	No	No	No	No	No	Yes (mild)	Yes (moderate)	Yes (Moderate)	Yes (mild)	No	No	No	6
T341	64	Widowed	Secondary	Hairdresser	13	1	2	Yes	49	No	No	Yes	No	Yes	No	No	Yes (moderate)	Yes (moderate)	No	No	No	No	Yes (mild)	Yes (mild)	No	No	No	No	8
T342	43	Married	Tertiary	Civil Servant	14	4	2	Yes	47	No	No	No	No	No	No	No	No	Yes (mild)	No	Yes (mild)	No	No	No	No	No	No	No	No	2
T343	48	Widowed	Tertiary	HouseWife	13	3	1	Yes	48	No	No	No	No	No	Yes	No	No	No	No	Yes (moderate)	yes (mild)	No	No	No	No	No	No	No	3
T344	47	Married	Tertiary	Teacher	15	2	3	Yes	48	Yes	Yes	Yes	No	No	Yes	No	No	No	No	Yes (mild)	No	Yes (mild)	No	Yes (Moderate)	No	No	Yes (mild)	No	3
	7.29158
	47.1

## Sheet: Raw data Control Grp
Form & serial No.	Age (years)	Marital Status	Education (Level)	Occupation	Menarche (Age) years	Parity (no. of children)	No.of sexual partners	Achieved menopause?	Age of Last Period (Yrs)	History of Menorrhagia	Contraception	Sexually active	Cigarette smoking	Alcohol use	Hypertension	Diabetes Mellitus	Night sweating	Cardiac complaints	Sleeping disorders	Joint/muscle complaints	Depression	Irritable	Anxious	Exhausted	Sexual problems	Urinary complaints	Vaginal dryness	Knowledge of Hormone Replacement Therapy	MRS total score
C1	60	Married	Tertiary	Unemployed	15	2	2	Yes	50	Yes	Yes	Yes	No	yes	No	No	Yes (mild)	Yes (severe)	Yes (mild)	Yes (severe)	No	yes (mild)	Yes (mild)	Yes (moderate)	Yes (moderate)	No	Yes (mild)	Yes	14
C2	56	Married	Secondary	Printer	Unk	2	1	Yes	48	Yes	No	Yes	No	No	Yes	No	No	No	No	Yes (mild)	No	No	No	No	No	No	No	No	3
C3	40	Married	Tertiary	Business	12	0	3	No		Yes	Yes	Yes	No	No	Yes	No	No	no	No	Yes (severe)	No	Yes (moderate)	Yes (moderate)	Yes (mild)	yes (mild)	No	No	No	10
C4	48	Married	Tertiary	Self Employed	16	2	3	No		No	No	Yes	No	yes	No	No	No	No	No	Yes (mild)	No	No	Yes (mild)	Yes (mild)	No	No	Yes (mild)	No	4
C5	55	Married	Tertiary	Self Employed	13	4	1	Yes	50	Yes	No	Yes	No	No	No	No	No	No	Yes (moderate)	No	No	No	No	No	No	Yes	No	No	4
C6	53	Single	Tertiary	Self Employed	13	6	1	Yes	51	No	Yes	No	No	No	Yes	No	yes (severe)	yes (moderate)	No	yes (very severe)	No	Yes (moderate)	Yes (mild)	Yes (moderate)	No	No	No	No	14
C7	56	Married	Tertiary	Private Sector	15	4	1	Yes	49	No	Yes	Yes	No	No	No	No	Yes (mild)	yes (moderate)	No	Yes (mild)	No	yes (mild)	No	Yes (mild)	No	No	No	No	6
C8	53	Single	no formal	Trader	15	6	1	No		No	Yes	Yes	No	No	No	No	No	No	No	yes (mild)	No	No	No	Yes (mild)	No	No	No	No	1
C9	51	Married	Tertiary	Civil Servant	14	3	1	Yes	45	No	No	Yes	No	No	No	No	No	yes (mild)	No	No	no	no	no	Yes (mild)	no	no	Yes (mild)	No	3
C10	46	widowed	Tertiary	Civil Servant	14	1	1	Yes	46	No	No	No	No	No	No	No	No	No	No	Yes (mild)	No	No	No	Yes (mild)	No	No	Yes (mild)	No	3
C11	38	Married	Tertiary	Accountant	14	3	5	No		Yes	Yes	Yes	No	Yes	Yes	No	No	yes (mild)	No	Yes (moderate)	No	yes (mild)	Yes (moderate)	Yes (moderate)	No	No	No	No	8
C12	52	Married	Tertiary	Trader	14	4	2	No		No	Yes	Yes	No	No	No	No	Yes (mild)	No	No	Yes (mild)	No	No	No	No	No	No	No	No	2
C13	42	Single	Secondary	Housekeeper	15	0	1	Yes	47	No	No	Yes	No	No	Yes	Yes	Yes (moderate)	No	Yes (moderate)	Yes (moderate)	Yes (moderate)	yes (mild)	Yes (severe)	Yes (moderate)	No	No	No	No	12
C14	46	Widowed	Secondary	Trader	16	4	2	No		No	Yes	Yes	No	No	No	No	No	No	Yes (mild)	Yes (moderate)	No	No	No	Yes (moderate)	No	No	No	No	6
C15	36	Single	Tertiary	IT Technician	13	1	3	No		Yes	Yes	Yes	No	No	No	No	Yes (moderate)	yes (mild)	Yes (moderate)	No	No	No	No	Yes (mild)	No	No	No	Yes	6
C16	39	Married	Tertiary	Civil Servant	14	1	8	No		No	Yes	Yes	No	No	No	No	No	No	No	Yes (mild)	Yes (mild)	No	Yes (mild)	Yes (mild)	No	No	No	No	4
C17	44	Single	Tertiary	Civil Servant	16	1	3	No		No	No	Yes	No	Yes	No	No	No	No	No	Yes (mild)	No	No	No	No	No	No	No	Yes	1
C18	54	Married	Tertiary	Self Employed	13	5	1	Yes	52	Yes	Yes	No	No	No	Yes	No	Yes (mild)	yes (moderate)	Yes (mild)	Yes (moderate)	Yes (mild)	Yes (moderate)	No	Yes (severe)	No	No	No	No	12
C19	48	Married	no formal	Self Employed	13	3	1	No		Yes	yes	No	No	No	No	No	yes (severe)	No	Yes (mild)	Yes (moderate)	Yes (mild)	Yes (moderate)	Yes (mild)	Yes (severe)	No	No	No	No	15
C20	55	Separated	Secondary	Trader	13	1	2	Yes	46	No	No	No	No	No	No	No	No	No	No	Yes (mild)	No	yes (mild)	No	Yes (mild)	No	No	No	No	3
C21	47	Married	Tertiary	Unemployed	15	0	1	Yes	40	Yes	Yes	Yes	No	No	Yes	Yes	No	no	No	Yes (mild)	No	No	No	No	No	No	No	No	6
C22	53	Separated	Secondary	Printer	15	2	2	Yes	43	No	No	Yes	No	No	No	No	No	No	No	No	No	no	No	No	No	No	No	No	6
C23	50	Married	Tertiary	Business	14	4	3	Yes	47	Yes	Yes	Yes	No	No	No	No	yes (severe)	No	No	No	No	No	no	No	No	No	No	Yes	1
C24	46	Separated	Secondary	Self Employed	14	6	8	No		No	No	Yes	No	No	No	No	Yes (mild)	yes (moderate)	Yes (moderate)	No	no	No	No	No	No	No	No	No	3
C25	38	Married	No Formal	Trader	14	4	3	No		No	No	No	No	No	No	No	No	yes (mild)	No	No	No	no	No	No	No	No	No	No	4
C26	48	Married	Primary	Self Employed	14	6	1	No		No	Yes	No	No	No	Yes	No	No	No	No	No	No	No	No	No	No	No	No	No	8
C27	42	Married	Secondary	Private Sector	15	4	1	No		No	Yes	No	No	Yes	Yes	No	No	yes (mild)	No	No	No	Yes (mild)	no	No	No	No	No	No	2
C28	46	Married	Tertiary	Trader	16	1	2	Yes	47	No	Yes	Yes	No	No	No	No	No	No	No	No	Yes (moderate)	no	No	No	No	No	No	No	8
C29	37	Single	Secondary	Civil Servant	13	3	4	Yes	56	Yes	No	Yes	No	No	Yes	No	Yes (mild)	yes (mild)	No	No	No	No	No	No	No	No	No	No	6
C30	39	Married	Secondary	Civil Servant	14	4	2	No		No	No	Yes	No	No	No	No	Yes (moderate)	No	No	No	No	No	No	No	No	No	No	No	6
C31	44	Single	Tertiary	Accountant	16	0	3	Yes	48	No	Yes	Yes	No	No	No	No	No	No	No	No	Yes (mild)	Yes (moderate)	no	No	No	No	No	No	4
C32	55	Married	Primary	Trader	13	4	1	No		No	Yes	No	No	No	No	No	Yes (moderate)	No	Yes (moderate)	No	No	No	No	No	No	No	No	No	1
C33	48	widowed	Tertiary	Housekeeper	13	1	1	Yes	49	Yes	No	No	No	Yes	No	No	No	yes (mild)	Yes (mild)	No	Yes (mild)	No	No	No	No	No	No	No	9
C34	52	Married	Secondary	Trader	13	2	1	No		No	Yes	No	No	No	Yes	No	No	No	No	No	Yes (mild)	Yes (mild)	No	No	No	No	No	No	11
C35	37	Married	Primary	IT Technician	15	1	1	No		No	Yes	Yes	No	No	Yes	No	Yes (mild)	No	No	Yes (moderate)	No	No	no	No	No	No	No	No	3
C36	37	Single	Tertiary	Civil Servant	15	1	2	Yes	40	Yes	Yes	Yes	No	No	No	No	yes (severe)	yes (moderate)	Yes (moderate)	No	No	No	No	No	No	No	No	No	8
C37	44	Widowed	Secondary	Trader	14	1	3	No		Yes	No	Yes	No	No	Yes	No	No	yes (moderate)	Yes (mild)	No	No	no	No	No	No	No	No	No	2
C38	55	Single	Tertiary	Self Employed	14	5	1	Yes	49	No	Yes	Yes	No	No	No	No	No	No	No	Yes (mild)	No	No	No	No	No	No	No	Yes	8
C39	48	Married	Secondary	Self Employed	14	3	2	No		Yes	yes	No	No	No	No	No	No	no	No	No	No	No	no	No	No	No	No	No	6
C40	52	Single	No Formal	Trader	14	1	1	No		No	Yes	No	No	Yes	No	No	yes (severe)	No	Yes (moderate)	No	No	no	No	No	No	No	No	No	6
C41	50	Married	Primary	Unemployed	15	0	2	Yes	42	Yes	No	No	No	No	No	No	No	No	Yes (mild)	Yes (mild)	No	No	No	No	No	No	No	No	4
C42	49	Married	Secondary	Printer	16	2	3	No		Yes	Yes	Yes	No	No	Yes	No	No	yes (moderate)	No	yes (mild)	No	Yes (moderate)	No	No	No	No	No	No	1
C43	49	Separated	Tertiary	Business	13	4	1	No		No	No	No	No	Yes	Yes	No	yes (severe)	yes (moderate)	No	No	No	no	no	No	No	No	No	No	9
C44	47	Married	Secondary	Self Employed	14	6	1	Yes	46	Yes	No	Yes	No	No	No	No	Yes (mild)	No	No	Yes (moderate)	No	No	No	Yes (severe)	No	Yes (moderate)	Yes (mild)	No	10
C45	58	Married	Secondary	Self Employed	16	4	1	No		No	Yes	No	No	No	Yes	No	No	yes (mild)	No	No	Yes (mild)	No	No	No	No	No	No	No	3
C46	56	Married	Tertiary	Self Employed	13	6	1	No		No	Yes	Yes	No	No	No	No	No	No	No	No	No	Yes (mild)	No	No	No	No	No	No	8
C47	40	Single	Primary	Private Sector	13	4	2	No		No	Yes	No	No	No	No	No	No	yes (mild)	No	No	No	No	no	No	No	No	No	No	2
C48	48	Married	Tertiary	Trader	13	1	1	Yes	47	No	No	Yes	No	No	No	No	No	No	No	Yes (severe)	No	No	No	Yes (severe)	No	No	Yes (mild)	No	8
C49	55	Married	Secondary	Civil Servant	15	3	2	No		No	No	Yes	No	Yes	No	No	Yes (mild)	No	No	No	Yes (mild)	no	No	No	No	No	No	Yes	6
C50	53	Married	Primary	Civil Servant	15	4	2	No		Yes	Yes	Yes	No	No	Yes	No	Yes (moderate)	No	No	No	No	No	No	No	Yes (moderate)	No	No	No	6
C51	56	Married	Tertiary	Accountant	14	0	3	No		No	Yes	Yes	No	No	Yes	No	No	yes (mild)	No	yes (mild)	No	No	no	No	No	No	No	No	4
C52	53	Married	Secondary	Trader	14	4	1	No		No	No	No	No	No	No	No	Yes (moderate)	No	No	No	No	no	No	No	No	No	No	No	1
C53	51	Single	Tertiary	Housekeeper	14	1	1	No		No	Yes	No	No	No	Yes	No	No	Yes (severe)	No	No	Yes (mild)	Yes (moderate)	Yes (severe)	Yes (moderate)	No	No	Yes (mild)	No	13
C54	46	Married	Secondary	Trader	14	2	2	No	47	Yes	Yes	No	No	No	No	No	No	yes (moderate)	No	No	No	No	No	No	No	No	No	No	10
C55	38	Single	No Formal	IT Technician	15	1	2	Yes	49	No	Yes	Yes	No	No	No	No	Yes (mild)	No	No	No	No	no	no	No	No	No	No	No	4
C56	52	Married	Primary	Civil Servant	16	4	2	No		No	Yes	No	No	No	No	No	yes (severe)	No	No	Yes (moderate)	No	No	No	No	No	No	No	No	6
C57	42	widowed	Secondary	Civil Servant	13	1	1	No		Yes	No	Yes	No	No	No	No	No	no	No	Yes (moderate)	Yes (mild)	No	No	No	No	No	No	No	5
C58	46	Married	Tertiary	Self Employed	14	2	1	No		Yes	Yes	No	No	No	Yes	No	No	No	Yes (mild)	No	No	no	No	No	No	No	No	No	9
C59	36	Married	Secondary	Self Employed	16	1	1	No		No	No	Yes	No	Yes	Yes	No	No	No	No	No	No	No	no	No	No	No	No	No	12
C60	39	Single	Secondary	Trader	13	1	1	Yes	48	Yes	No	Yes	Yes	No	No	No	yes (severe)	yes (moderate)	No	No	No	No	No	No	No	No	No	No	7
C61	44	Widowed	Tertiary	Unemployed	13	1	3	No		No	Yes	No	No	No	No	Yes	Yes (mild)	yes (mild)	No	yes (mild)	Yes (mild)	no	No	No	No	No	No	No	9
C62	54	Single	Tertiary	Printer	13	5	2	No		Yes	Yes	Yes	No	No	No	No	No	No	No	No	No	No	No	No	No	No	Yes (mild)	Yes	7
C63	48	Married	Secondary	Business	14	3	2	No		No	Yes	No	No	No	No	No	No	yes (mild)	No	No	No	Yes (mild)	no	No	No	No	No	No	9
C64	55	Single	Tertiary	Self Employed	14	1	1	No		No	No	Yes	No	No	No	No	No	No	No	No	No	no	No	No	No	yes (mild)	No	No	6
C65	45	Married	Secondary	Business	14	0	1	Yes	46	No	No	No	No	Yes	No	No	No	yes (mild)	No	No	Yes (moderate)	No	No	No	No	No	No	No	9
C66	47	Married	No Formal	Unemployed	14	2	2	Yes		No	Yes	No	No	No	Yes	No	Yes (mild)	No	No	No	No	No	No	No	No	No	No	No	9
C67	47	Separated	Primary	Private Sector	15	4	3	No		No	Yes	No	No	No	Yes	No	No	No	Yes (mild)	No	No	no	no	No	No	No	No	No	8
C68	49	Married	Secondary	Trader	16	6	2	Yes	49	Yes	No	Yes	No	No	No	No	No	No	No	Yes (moderate)	No	No	No	No	No	No	No	No	9
C69	48	Married	Tertiary	Civil Servant	13	4	2	No		No	Yes	Yes	No	No	Yes	No	Yes (moderate)	yes (mild)	Yes (moderate)	No	No	No	No	No	No	No	No	No	7
C70	47	Separated	Secondary	Civil Servant	14	6	1	No		No	No	Yes	No	No	No	No	No	No	No	Yes (moderate)	No	no	No	No	No	No	No	No	9
C71	48	Married	Secondary	Accountant	16	4	1	No		No	No	No	No	No	No	No	No	No	No	No	No	Yes (moderate)	no	No	No	No	No	No	7
C72	50	Single	Tertiary	Trader	13	1	1	Yes	46	Yes	Yes	Yes	No	No	Yes	No	Yes (mild)	yes (moderate)	No	Yes (mild)	No	No	No	No	No	No	Yes (mild)	No	9
C73	51	Married	Primary	Housekeeper	13	3	2	No		No	Yes	No	No	No	No	No	yes (severe)	yes (mild)	No	No	Yes (mild)	no	No	No	yes (mild)	No	No	No	6
C74	44	Married	Tertiary	Trader	13	4	1	No		No	Yes	No	No	No	Yes	No	No	No	No	Yes (moderate)	No	No	No	No	No	No	No	No	5
C75	46	Single	Secondary	IT Technician	15	0	2	No		Yes	No	No	No	Yes	No	No	No	no	Yes (mild)	No	No	No	no	No	No	No	Yes (mild)	No	8
C76	47	Married	Primary	Civil Servant	15	4	1	No		Yes	No	Yes	No	No	No	No	No	No	No	Yes (mild)	No	no	No	No	No	No	No	No	6
C77	53	Married	Tertiary	Trader	14	1	1	Yes		No	Yes	Yes	No	No	Yes	Yes	yes (severe)	No	No	Yes (moderate)	Yes (mild)	No	No	No	No	No	No	No	6
C78	50	Single	Secondary	Self Employed	14	2	1	No		Yes	Yes	No	No	No	No	No	No	yes (moderate)	No	No	No	No	No	No	No	No	No	No	4
C79	46	Single	Tertiary	Self Employed	14	1	3	Yes	41	No	No	Yes	No	No	No	No	No	No	No	No	No	no	no	No	No	No	No	No	1
C80	38	Married	Secondary	Trader	14	1	2	Yes	48	Yes	Yes	No	No	No	No	No	yes (severe)	No	Yes (moderate)	No	No	No	No	No	No	No	No	No	4
C81	48	Single	No Formal	Unemployed	15	3	1	No		Yes	Yes	Yes	No	Yes	No	No	No	yes (mild)	No	No	Yes (mild)	No	No	No	No	No	No	No	6
C82	42	Widowed	Primary	Printer	16	4	1	Yes	55	No	Yes	No	No	No	Yes	No	No	No	No	Yes (severe)	No	no	No	No	No	No	No	No	4
C83	46	Single	Secondary	Business	13	0	1	No		Yes	No	No	No	No	No	No	No	No	No	No	No	Yes (moderate)	no	No	No	No	No	No	6
C84	37	Married	Tertiary	Self Employed	14	4	2	No		No	Yes	Yes	No	No	No	No	No	yes (mild)	No	No	No	No	No	No	No	No	No	No	5
C85	39	Married	Secondary	Self Employed	16	1	1	No		No	yes	Yes	No	No	Yes	No	No	No	Yes (mild)	No	Yes (moderate)	no	No	No	No	No	No	No	9
C86	44	Single	Secondary	Unemployed	14	2	3	No		No	Yes	Yes	No	No	No	No	Yes (mild)	No	No	Yes (mild)	No	No	No	No	No	No	Yes (mild)	No	10
C87	55	Widowed	Tertiary	Civil Servant	13	1	1	Yes	47	No	No	No	No	No	No	No	Yes (moderate)	No	No	No	No	No	no	No	No	No	No	No	7
C88	48	Single	Secondary	Trader	13	1	4	Yes	49	No	Yes	No	No	No	No	No	No	No	No	No	No	no	No	No	No	No	No	No	9
C89	52	Married	Tertiary	Civil Servant	13	3	3	Yes	48	Yes	No	Yes	No	No	No	No	Yes (moderate)	No	No	No	Yes (mild)	Yes (moderate)	No	No	No	No	No	No	7
C90	37	Married	Primary	Business	14	5	1	No		No	No	Yes	No	No	Yes	No	No	yes (mild)	Yes (mild)	No	No	No	No	No	No	No	No	No	9

## Sheet: Premenopausal
Form No.	Age(Yrs)	Marital Status	Education(Level)	Occupation	Menarche (Age)	Parity(no of children)	No.of sexual partners	History of Menorrhagia	Age of Last Period (Yrs)	Contraception	Sexually active	Cigarette smoking	Alcohol use	Hypertension	Diabetes Mellitus	Night sweating (Som)	Cardiac complaints (Som)	Sleeping disorders (Som)	Joint/muscle complaints (Som)	Depression (Psy)	Irritable (Psy)	Anxious (Psy)	Exhausted (Psy)	Sexual problems (Uro)	Urinary complaints (Uro)	Vaginal dryness (Uro)	Knowledge of Hormone Replacement Therapy	MRS TOTAL SCORE
T1	37	Married	Secondary	Self Employed	15	2	3	No		Yes	Yes	No	No	No	No	No	No	No	No	No	No	No	No	No	No	No	No	0
T2	41	Married	Secondary	Fashion Designer	17	3	1	No		Yes	Yes	No	No	No	No	No	No	No	No	No	No	No	No	No	No	No	No	0
T3	46	Married	Secondary	Self Employed	15	0	3	Yes		No	Yes	No	Yes	No	No	No	No	No	Yes (mild)	No	No	No	Yes (mild)	No	Yes (mild)	Yes (moderate)	No	5
T4	46	Married	Tertiary	Business	15	3	2	No		Yes	Yes	No	No	No	No	Yes (mild)	No	No	Yes (moderate)	No	No	No	No	No	No	No	No	2
T9	48	Married	Primary	Self Employed	17	0	3	Yes		Yes	Yes	No	Yes	No	No	No	No	No	Yes (mild)	No	No	Yes (moderate)	No	No	No	No	No	4
T10	44	Married	Secondary	Business	16	1	5	No		Yes	Yes	No	No	No	No	No	Yes (mild)	No	No	No	No	No	No	No	No	No	No	0
T12	46	Married	Secondary	Self Employed	14	4	6	No		Yes	Yes	No	Yes	Yes	No	Yes (moderate)	No	No	No	No	Yes (mild)	No	No	No	No	Yes (mild)	Yes	3
T17	44	Married	Secondary	Self Employed	14	4	3	No		No	No	No	Yes (mild)	No	No	No	No	No	No	No	Yes (mild)	No	No	No	No	Yes (mild)	No	2
T19	43	Married	Tertiary	Self Employed	16	2	2	Yes		No	No	No	Yes	Yes	No	No	No	No	Yes (moderate)	No	No	Yes (mild)	No	No	Yes (mild)	No	No	5
T20	40	Single	Tertiary	Self Employed	14	0	4	No		Yes	Yes	No	Yes	No	No	No	No	Yes (mild)	Yes (mild)	No	No	No	No	No	No	No	No	1
T21	46	Married	Secondary	Self Employed	14	3	3	Yes		No	No	No	No	No	No	No	No	No	Yes (mild)	No	No	No	No	No	No	No	No	2
T22	43	Single	Tertiary	Self Employed	15	1	4	Yes		Yes	No	No	Yes	No	No	No	No	No	Yes (mild)	No	No	No	No	No	No	Yes (moderate)	Yes	9
T26	48	Married	Secondary	Self Employed	16	1	6	Yes		No	No	No	Yes	Yes	No	Yes (mild)	No	No	Yes (moderate)	No	No	Yes (mild)	No	No	No	No	No	4
T28	44	Widowed	Secondary	Self Employed	18	1	2	No		Yes	No	No	No	Yes	No	yes (moderate)	Yes (moderate)	yes (mild)	No	No	Yes (mild)	No	No	No	No	No	No	1
T32	45	Widowed	Secondary	Trader	14	3	3	No		Yes	Yes	No	No	Yes	No	Yes (moderate)	No	No	No	No	No	No	No	No	No	No	No	0
T35	43	Married	Tertiary	Civil Servant	14	0	3	No		No	No	No	No	No	No	No	No	Yes (mild)	No	No	Yes (mild)	Yes (mild)	No	No	No	Yes (mild)	No	5
T36	36	Married	Tertiary	Self Employed	17	0	2	No		No	Yes	No	No	No	No	No	No	yes (mild)	No	No	No	No	No	No	No	No	No	0
T40	45	Married	Secondary	Self Employed	18	3	4	Yes		Yes	Yes	No	No	No	No	Yes (moderate)	No	Yes (moderate)	Yes (moderate)	No	Yes (mild)	No	No	No	No	No	No	4
T41	43	Married	Secondary	Self Employed	17	3	2	No		Yes	Yes	No	No	No	No	No	No	No	Yes (moderate)	No	Yes (moderate)	No	No	No	No	No	No	5
T42	43	Single	Tertiary	Self Employed	14	1	5	No		Yes	Yes	No	No	No	No	No	Yes (mild)	Yes (moderate)	No	No	No	No	No	No	No	No	No	0
T43	38	Married	Tertiary	Civil Servant	16	1	3	No		No	Yes	No	No	No	No	No	Yes (mild)	No	Yes (mild)	No	No	No	No	No	No	Yes (mild)	No	2
T45	35	Single	Tertiary	Business	16	0	4	No		No	No	No	Yes	Yes	No	No	No	Yes (mild)	No	No	Yes (mild)	No	No	No	No	No	No	2
T48	45	Widowed	Tertiary	Teacher	14	1	1	Yes		No	No	No	No	No	No	No	No	No	Yes (mild)	No	No	No	No	No	No	No	No	1
T49	38	Married	Primary	Trader	15	1	2	Yes		Yes	Yes	No	No	No	No	No	No	No	Yes (severe)	No	No	Yes (mild)	Yes (mild)	No	No	No	No	5
T53	45	Married	Secondary	Teacher	16	4	2	No		Yes	Yes	No	No	Yes	No	No	No	No	Yes (moderate)	No	No	Yes (mild)	No	No	No	No	No	3
T56	46	Married	Tertiary	Business	Unk	3	2	Yes		No	Yes	No	Yes	No	No	Yes (moderate)	No	No	No	No	No	No	No	No	No	No	No	0
T59	45	Single	Tertiary	Unemployed	14	1	1	Yes		No	No	No	No	No	No	Yes (moderate)	No	No	Yes (mild)	No	No	Yes (mild)	No	No	No	No	No	2
T60	42	Married	Primary	Trader	12	3	3	No		Yes	Yes	No	No	No	No	No	No	No	No	No	No	No	No	Yes (severe)	No	Yes (very severe)	No	7
T64	44	Widowed	Secondary	Teacher	12	7	2	Yes		No	No	No	No	No	No	Yes (severe)	Yes (mild)	No	No	No	No	No	No	No	No	No	No	0
T67	45	Married	Tertiary	Trader	16	4	5	No		Yes	Yes	No	Yes	Yes	No	No	No	No	No	No	No	No	No	No	No	No	No	1
T68	46	Married	Tertiary	Trader	15	3	2	No		No	Yes	No	No	No	No	No	No	No	No	No	No	No	No	No	No	No	Yes	0
T70	45	Widowed	Secondary	Trader	14	3	2	Yes		No	No	No	Yes	No	No	No	No	Yes (mild)	No	No	No	No	No	No	No	No	No	0
T71	42	Married	Secondary	Trader	Unk	2	1	Yes		Yes	Yes	No	No	No	No	No	No	Yes (moderate)	Yes (mild)	No	No	No	No	No	No	No	No	1
T72	45	Married	Secondary	Self Employed	16	4	1	Yes		Yes	Yes	No	No	Yes	No	Yes (severe)	Yes (severe)	No	Yes (mild)	No	No	No	No	No	No	No	No	1
T73	45	Married	Secondary	Civil Servant	16	2	5	Yes		No	Yes	No	Yes (occasionally)	Yes	No	Yes (severe)	No	No	No	No	No	Yes (moderate)	No	No	No	No	No	5
T74	43	Single	Secondary	Self Employed	16	0	1	Yes		No	No	No	No	No	No	No	No	No	Yes (mild)	No	No	No	No	No	No	No	No	5
T81	41	Married	Primary	Trader	16	1	5	No		No	No	No	Yes	No	No	No	Yes (mild)	No	No	No	Yes (severe)	Yes (severe)	No	No	No	No	No	6
T83	46	Married	Secondary	Business	15	2	5	Yes		Yes	Yes	No	No	No	No	No	No	yes (mild)	Yes (mild)	No	No	No	No	No	No	No	No	2
T93	45	Divorced	Tertiary	Teacher	15	3	1	No		No	Yes	No	No	No	No	No	No	No	No	No	Yes (mild)	No	No	No	No	No	No	5
T94	47	Married	Primary	Trader	13	3	1	No		Yes	Yes	No	Yes	No	No	No	Yes (moderate)	Yes (mild)	Yes (moderate)	No	No	No	No	No	No	No	No	2
T95	44	Widowed	Secondary	Farmer	15	3	3	No		Yes	No	No	No	No	No	No	Yes (mild)	No	No	No	No	No	No	No	No	No	No	1
T96	43	Married	Primary	Hairdresser	18	2	1	Yes		No	Yes	No	No	No	No	No	No	No	No	No	No	No	Yes (mild)	No	No	No	No	1
T98	45	Widowed	Secondary	Trader	20	3	1	No		No	No	No	No	Yes	No	No	No	No	No	No	No	No	No	No	No	No	No	2
T99	42	Single	Secondary	Sales Rep	15	1	4	No		Yes	No	No	Yes	No	No	No	No	No	Yes (mild)	No	No	No	No	No	Yes (mild)	No	No	4
T101	44	Married	Tertiary	Trader	15	3	1	No		No	Yes	No	No	No	No	No	No	No	No	No	No	No	No	No	Yes (moderate)	No	No	2
T107	41	Divorced	Secondary	Trader	13	4	5	No		No	No	No	yes	No	No	No	No	No	Yes (very severe)	No	Yes (mild)	No	No	No	No	No	No	8
T109	43	Widowed	Secondary	Trader	12	1	1	No		Yes	No	No	yes	No	No	No	No	Yes (moderate)	Yes (severe)	No	No	No	Yes (Moderate)	No	No	No	No	5
T113	42	Married	Tertiary	Self Employed	15	5	3	No		Yes	Yes	No	No	No	No	Yes (very severe)	No	yes (mild)	No	No	No	yes (mild)	No	No	No	No	Yes	1
T115	36	Married	Secondary	kfc	13	3	4	Yes		No	Yes	No	No	No	No	No	No	No	No	No	No	No	No	Yes (moderate)	No	No	No	2
T116	36	Married	Secondary	Civil Servant	15	3	1	No		Yes	Yes	No	No	No	No	No	No	No	Yes (mild)	No	No	No	No	No	No	No	No	2
T117	40	Married	Tertiary	Trader	12	3	1	No		Yes	Yes	No	No	No	No	No	Yes (moderate)	No	No	No	No	No	No	No	No	No	No	0
T118	42	Married	Tertiary	Business	15	2	2	No		Yes	No	No	No	No	No	No	No	Yes (mild)	Yes (moderate)	No	No	No	No	No	No	No	No	2
T122	39	Married	Secondary	Trader	14	2	2	No		Yes	Yes	No	No	No	No	No	Yes (mild)	No	No	No	No	No	No	No	No	No	No	2
T125	43	Married	Secondary	Trader	13	5	5	Yes		Yes	Yes	No	No	No	No	No	No	No	No	No	No	Yes (mild)	No	Yes (moderate)	No	No	No	3
T128	42	Married	Tertiary	Clearing Agent	16	2	1	No		No	Yes	No	Yes	No	No	No	No	No	No	No	No	No	Yes (Moderate)	No	No	No	No	2
T133	45	Married	Secondary	Cleaner	13	0	0	No		No	No	No	No	No	No	No	No	No	Yes (mild)	No	No	No	No	No	No	No	No	1
T134	41	Married	Tertiary	Teacher	13	2	1	No		No	Yes	No	No	No	No	No	Yes (mild)	No	Yes (moderate)	No	No	Yes (mild)	No	Yes (mild)	No	Yes (mild)	Yes	5
T135	43	Separated	Tertiary	Self Employed	Unk	0	0	No		No	No	No	No	No	No	No	Yes (mild)	No	No	No	No	No	Yes (mild)	No	No	Yes (mild)	No	2
T136	35	Single	Secondary	Trader	Unk	0	Unk	No		Yes	Yes	No	No	No	No	No	No	Yes (moderate)	No	No	No	No	No	No	No	No	No	0
T137	48	Widowed	No Formal	Trader	15	3	1	No		Yes	No	No	No	No	No	Yes (mild)	No	No	No	No	No	No	No	No	No	No	No	0
T138	41	Married	Secondary	Business	14	4	3	No		No	Yes	No	No	No	No	No	No	No	Yes (mild)	No	No	No	No	No	No	No	No	1
T139	47	Married	Tertiary	Trader	16	1	2	No		Yes	Yes	No	Yes	No	No	No	No	Yes (mild)	Yes (moderate)	No	No	No	No	No	No	Yes (moderate)	Yes	4
T140	48	Single	Tertiary	Self Employed	11	0	2	No		No	No	No	No	Yes	No	Yes (mild)	No	Yes (severe)	No	No	No	No	No	No	No	Yes (mild)	No	1
T141	42	Married	Tertiary	Self Employed	16	0	Unk	No		Yes	Yes	No	No	No	No	No	No	Yes (moderate)	Yes (moderate)	No	No	No	No	No	No	Yes (mild)	No	3
T142	43	Married	Primary	Self Employed	16	4	2	No		No	Yes	No	No	No	No	No	No	No	No	No	No	No	No	No	No	No	No	0
T143	39	Separated	No Formal	Farmer	13	2	2	No		No	No	No	Yes	No	No	No	No	No	Yes (mild)	No	No	No	Yes (mild)	Yes (mild)	No	No	No	3
T144	44	Married	Tertiary	Business	11	2	4	Yes		No	Yes	No	No	No	No	No	No	No	Yes (severe)	No	Yes (mild)	Yes (moderate)	No	No	No	No	No	6
T147	36	Married	Tertiary	Human Resources	13	0	3	No		No	Yes	No	No	No	No	No	No	No	Yes (moderate)	No	No	No	No	Yes (severe)	No	No	Yes	5
T148	42	Divorced	Tertiary	Trader	13	2	2	No		Yes	Yes	No	No	Yes	No	No	Yes (mild)	No	Yes (moderate)	No	No	No	Yes (mild)	No	No	No	No	3
T151	42	Married	Secondary	Trader	13	5	Unk	Yes		Yes	Yes	No	No	No	No	No	No	No	No	No	No	No	No	No	No	No	No	0
T155	38	Married	Tertiary	Business	15	2	3	No		Yes	Yes	No	No	No	No	No	No	No	Yes (moderate)	No	No	No	Yes (Moderate)	Yes (mild)	No	No	No	5
T158	45	Married	Tertiary	Business	17	1	3	No		No	Yes	No	No	No	No	No	No	No	No	No	No	No	No	Yes (moderate)	No	No	No	2
T160	39	Married	Tertiary	Trader	16	3	3	Yes		Yes	Yes	No	No	No	No	No	Yes (mild)	No	No	No	No	No	No	No	No	No	No	2
T163	46	Widowed	Tertiary	Marketer	13	1	Unk	No		Yes	No	No	yes	No	No	No	No	Yes (mild)	No	No	No	Yes (mild)	No	No	No	No	No	3
T164	41	Widowed	Secondary	Unemployed	Unk	4	1	Yes		No	No	No	No	Yes	No	No	No	No	No	No	Yes (mild)	No	No	No	No	No	No	1
T165	42	Single	Tertiary	Trader	13	3	1	No		Yes	No	No	No	No	No	No	Yes (moderate)	Yes (severe)	Yes (moderate)	No	No	No	Yes (mild)	Yes (moderate)	No	No	No	5
T168	39	Married	Secondary	Hairdresser	10	2	5	No		No	Yes	No	No	No	No	No	No	No	No	No	No	No	No	No	No	No	No	0
T169	43	Married	Primary	Hairdresser	15	3	10	Yes		Yes	Yes	Yes	Yes	No	No	No	No	No	No	No	No	No	No	No	No	No	No	0
T171	40	Married	Secondary	HouseWife	13	0	1	No		No	No	No	No	No	No	No	No	No	Yes (moderate)	No	No	No	No	No	No	No	No	2
T172	36	Married	Tertiary	Teacher	14	0	7	Yes		No	Yes	No	No	No	No	No	No	No	No	No	No	No	Yes (mild)	No	No	yes (mild)	No	2
T175	45	Married	Tertiary	Chemist	13	3	1	Yes		No	Yes	No	No	No	No	Yes (mild)	No	No	No	No	Yes (mild)	No	No	No	No	No	No	2
T176	43	Married	Tertiary	Self Employed	12	3	3	No		Yes	Yes	No	Yes	Yes	No	No	Yes (mild)	yes (mild)	Yes (moderate)	No	No	yes (mild)	Yes (mild)	No	No	No	No	5
T179	37	Married	Primary	Cleaner	13	5	4	No		Yes	Yes	No	No	No	No	No	No	No	No	No	No	No	No	No	No	No	No	0
T181	47	Married	Primary	Trader	17	4	1	No		Yes	Yes	No	No	No	No	No	No	No	No	No	No	No	No	No	No	No	No	1
T182	39	Married	Tertiary	Self Employed	16	4	Unk	No		Yes	Yes	No	Yes	No	No	No	No	No	No	No	No	No	No	No	No	No	No	0
T183	35	Married	Secondary	Self Employed	19	0	2	Yes		No	Yes	No	No	No	No	No	No	No	Yes (mild)	No	No	Yes (mild)	No	No	No	Yes (mild)	Yes	5
T186	47	Married	Secondary	Trader	Unk	4	1	Yes		Yes	Yes	No	No	No	No	No	No	No	Yes (mild)	No	No	No	No	No	No	Yes (mild)	No	2
T188	45	Married	Secondary	Trader	18	3	3	Yes		No	Yes	No	No	No	No	No	No	No	No	No	No	Yes (mild)	No	No	No	No	No	1
T191	45	Married	Secondary	Artisan	15	2	4	No		Yes	Yes	No	yes	No	No	No	Yes (mild)	No	Yes (mild)	No	No	No	No	yes (mild)	No	No	No	2
T192	41	Married	Tertiary	skin therapist	Unk	3	Unk	Yes		Yes	Yes	No	No	No	No	No	No	No	No	No	No	No	No	No	No	No	No	0
T196	40	Single	Primary	Self Employed	Unk	1	2	Yes		Yes	No	No	No	No	No	No	No	No	Yes (moderate)	No	No	No	No	No	No	No	No	3
T203	43	Married	Secondary	Trader	15	4	1	No		Yes	No	No	Yes	No	No	No	No	No	No	No	No	Yes (mild)	No	No	No	No	No	6
T207	47	Married	Secondary	Catering	17	5	1	Yes		No	Yes	No	No	No	No	No	No	No	Yes (severe)	No	No	No	Yes (Moderate)	No	no	no	Yes	5
T208	44	Married	Secondary	Fashion Designer	13	1	4	Yes		No	Yes	No	Yes	Yes	No	No	No	No	Yes (moderate)	No	No	Yes (moderate)	Yes (Moderate)	No	Yes (moderate)	Yes (mild)	No	11
T209	45	Single	Tertiary	Nurse	15	1	3	Yes		Yes	Yes	No	No	No	No	No	No	No	No	No	No	No	No	No	No	No	Yes	0
T213	40	Widowed	Tertiary	Self Employed	12	2	6	No		Yes	Yes	No	yes	No	No	No	No	Yes (mild)	No	No	No	No	No	No	No	No	No	0
T216	44	Married	Tertiary	Teacher	16	4	1	No		Yes	Yes	No	No	No	No	No	No	No	No	No	No	No	No	No	No	No	No	1
T218	44	Married	Tertiary	Teacher	12	1	2	No		Yes	Yes	No	yes	No	No	No	No	No	Yes (moderate)	No	Yes (moderate)	Yes (mild)	No	No	No	No	No	5
T222	40	Married	Secondary	Trader	Unk	4	2	Yes		Yes	Yes	No	No	No	No	No	No	No	No	No	No	No	No	No	No	No	No	0
T224	40	Married	Secondary	Trader	17	3	3	No		No	Yes	No	No	No	No	No	Yes (severe)	No	Yes (moderate)	No	No	No	No	No	No	No	No	2
T225	43	Married	Secondary	Trader	Unk	2	1	Yes		Yes	Yes	No	No	No	No	No	No	No	Yes (moderate)	No	Yes (mild)	Yes (mild)	No	No	No	No	No	4
T226	38	Married	Secondary	Trader	Unk	3	5	No		No	Yes	No	yes	No	No	No	No	No	No	No	Yes (mild)	No	No	No	No	Yes (severe)	No	5
T227	40	Married	Tertiary	Influencer	15	3	2	Yes		Yes	Yes	No	No	Yes	No	No	No	No	No	No	No	No	Yes (mild)	No	No	No	Yes	3
T228	43	Single	Tertiary	Trader	14	0	3	Yes		Yes	No	No	No	Yes	No	No	No	No	Yes (mild)	No	No	No	No	No	No	No	No	1
T230	45	Widowed	Secondary	Trader	16	3	7	No		Yes	Yes	No	Yes	No	No	No	No	Yes (mild)	Yes (severe)	No	No	No	No	No	No	Yes (very severe)	No	7
T231	44	Married	Tertiary	Business	14	3	3	No		Yes	Yes	No	Yes	No	No	No	No	No	No	No	No	No	No	No	No	No	No	0
T232	39	Married	Secondary	Unemployed	16	2	2	No		No	Yes	No	No	No	No	No	Yes (mild)	No	No	No	No	No	Yes (Moderate)	No	No	No	No	3
T234	44	Married	No Formal	Trader	unk	4	1	No		No	Yes	No	No	No	No	No	No	No	Yes (moderate)	No	No	No	No	No	No	No	No	2
T237	46	Married	Secondary	Trader	15	4	3	No		Yes	Yes	No	No	No	No	No	No	No	No	No	No	No	No	No	No	No	No	0
T238	39	Married	Tertiary	Fashion Designer	15	1	5	No		Yes	Yes	No	No	No	No	No	No	No	No	No	No	No	No	Yes (mild)	No	Yes (moderate)	Yes	7
T244	40	Single	Secondary	Self Employed	17	1	8	No		Yes	Yes	No	Yes	No	No	No	No	No	Yes (mild)	No	No	No	Yes (mild)	No	No	No	No	2
T8	43	Married	Tertiary	Teacher	15	2	2	Yes		Yes	Yes	No	Yes	No	No	No	No	No	Yes (mild)	Yes (mild)	No	No	No	Yes (mild)	Yes (mild)	No	No	6					v
T16	44	Married	Tertiary	Civil Servant	19	5	4	Yes		Yes	No	No	No	No	No	No	No	No	Yes (moderate)	Yes (mild)	Yes (mild)	Yes (mild)	Yes (mild)	No	No	Yes (mild)	No	8
T18	46	Married	Primary	Self Employed	16	2	5	No		No	Yes	No	No	No	No	No	No	No	Yes (moderate)	Yes (mild)	No	Yes (moderate)	No	No	No	No	No	6
T24	45	Married	Tertiary	Self Employed	17	2	3	No		Yes	Yes	No	Yes	No	No	No	No	No	Yes (moderate)	Yes (mild)	Yes (mild)	No	Yes (mild)	No	No	No	Yes	6
T34	35	Single	Tertiary	Self Employed	15	0	1	Yes		No	Yes	No	No	No	No	No	No	No	Yes (mild)	Yes (mild)	Yes (moderate)	Yes (mild)	No	Yes (moderate)	No	Yes (moderate)	No	9
T58	41	Single	Tertiary	Business	16	0	10	Yes		Yes	No	No	No	No	No	No	No	No	No	Yes (mild)	No	Yes (mild)	No	No	No	No	No	1
T62	44	Widowed	Tertiary	Civil Servant	14	2	3	No		Yes	Yes	No	No	No	No	No	No	Yes (moderate)	Yes (mild)	Yes (mild)	Yes (moderate)	Yes (moderate)	Yes (mild)	Yes (severe)	No	Yes (severe)	Yes	15
T63	37	Married	Tertiary	Trader	16	2	3	No		No	Yes	No	No	No	No	No	No	No	Yes (mild)	Yes (mild)	Yes (mild)	No	No	No	No	No	No	4
T69	46	Divorced	Secondary	Factory Worker	19	2	5	Yes		Yes	Yes	No	No	No	No	Yes (mild)	No	No	No	Yes (mild)	Yes (mild)	No	No	No	No	Yes (mild)	No	3
T75	46	Single	Secondary	Self Employed	14	1	6	No		No	No	No	Yes	Yes	No	No	No	No	Yes (moderate)	Yes (mild)	No	No	No	Yes (moderate)	No	No	No	5
T78	45	Married	Primary	Trader	14	2	2	Yes		Yes	Yes	No	No	No	No	No	No	No	Yes (mild)	Yes (mild)	Yes (mild)	Yes (mild)	Yes (very severe)	No	No	Yes (mild)	No	10
T84	40	Married	Primary	Trader	Unk	3	1	No		No	Yes	No	No	No	No	No	No	No	No	Yes (mild)	Yes (mild)	Yes (mild)	No	No	No	No	No	3
T91	41	Married	Tertiary	Self Employed	15	4	1	No		No	No	No	Yes	No	No	No	No	No	Yes (severe)	Yes (mild)	No	Yes (mild)	Yes (severe)	No	No	No	No	14
T102	40	Married	Secondary	Trader	17	4	1	Yes		Yes	Yes	No	No	No	Yes	No	No	No	Yes (severe)	Yes (mild)	No	No	No	No	No	No	No	4
T108	48	Married	Tertiary	Trader	18	4	3	Yes		No	Yes	No	No	No	No	Yes (mild)	No	No	Yes (severe)	yes (mild)	No	No	No	yes (mild)	no	no	no	5
T112	38	Single	Secondary	site mgr	17	1	3	No		Yes	Yes	No	No	No	No	No	Yes (severe)	No	Yes (mild)	Yes (mild)	Yes (mild)	No	No	No	No	No	No	3
T121	38	Single	Tertiary	Self Employed	14	0	1	Yes		Yes	Yes	No	No	No	No	No	No	No	No	Yes (mild)	Yes (mild)	Yes (mild)	Yes (Moderate)	Yes (mild)	No	No	No	7
T124	45	Separated	Tertiary	Trader	13	2	4	No		Yes	Yes	No	No	Yes	No	No	No	Yes (moderate)	Yes (mild)	Yes (mild)	No	No	No	No	No	No	No	3
T132	40	Married	Tertiary	Trader	Unk	3	1	No		No	Yes	No	Yes	No	No	No	No	No	Yes (mild)	Yes (mild)	Yes (moderate)	No	No	No	No	Yes (mild)	No	6
T173	40	Married	Secondary	Farmer	15	4	3	Yes		Yes	Yes	No	No	No	No	No	No	No	yes (mild)	yes (mild)	yes (mild)	yes (moderate)	Yes (mild)	No	No	yes (mild)	No	12
T174	37	Separated	Tertiary	Chef	17	5	1	Yes		No	No	No	No	No	No	No	No	No	Yes (mild)	Yes (mild)	Yes (severe)	Yes (moderate)	No	No	No	No	No	8
T178	48	Single	Tertiary	Trader	15	1	6	No		Yes	Yes	No	No	Yes	No	Yes (mild)	No	Yes (moderate)	Yes (mild)	Yes (mild)	Yes (mild)	Yes (moderate)	No	No	No	No	Yes	8
T187	46	Separated	Tertiary	Self Employed	15	1	1	No		Yes	Yes	No	No	No	No	No	No	Yes (mild)	Yes (mild)	Yes (mild)	Yes (mild)	No	No	No	No	No	Yes	3
T194	37	Widowed	Secondary	Clergy	14	1	4	No		Yes	No	No	No	No	No	No	No	No	No	Yes (mild)	Yes (mild)	Yes (mild)	No	No	No	No	No	7
T200	46	Widowed	Tertiary	Teacher	12	3	3	Yes		No	No	No	Yes	Yes	No	No	No	No	Yes (mild)	yes (mild)	No	No	Yes (severe)	No	No	No	No	7
T201	37	Single	Secondary	Trader	18	2	2	No		Yes	Yes	No	Yes	No	No	No	No	No	Yes (mild)	yes (mild)	yes (very severe)	No	No	No	No	Yes (mild)	No	7
T205	45	Widowed	Secondary	Civil Servant	19	2	1	No		No	No	No	No	No	No	No	No	No	Yes (mild)	yes (mild)	No	Yes (mild)	Yes (mild)	No	Yes (mild)	No	No	5
T217	45	Widowed	Secondary	Trader	13	1	2	Yes		No	No	No	No	No	No	Yes (mild)	No	No	Yes (mild)	Yes (mild)	Yes (moderate)	No	Yes (mild)	No	No	No	No	6
T219	35	Married	Tertiary	Administration	13	0	2	Yes		Yes	Yes	No	No	No	No	No	No	No	No	Yes (mild)	Yes (mild)	No	Yes (Moderate)	No	No	Yes (mild)	Yes	7
T235	40	Married	Tertiary	Trader	15	2	1	No		No	No	No	No	No	No	No	No	No	Yes (mild)	Yes (mild)	No	Yes (mild)	Yes (Moderate)	No	No	Yes (severe)	No	8
T242	35	Married	Secondary	Trader	16	3	Unk	Yes		Yes	Yes	No	yes	Yes	No	No	No	No	Yes (mild)	Yes (mild)	No	No	Yes (Moderate)	No	No	No	No	4
T11	43	Married	Tertiary	Trader	17	2	3	No		Yes	Yes	No	No	No	No	No	No	No	No	Yes (moderate)	No	No	No	No	No	Yes (mild)	No	3
T25	43	Married	Secondary	Self Employed	12	2	3	Yes		Yes	Yes	No	Yes	No	No	No	No	No	Yes (moderate)	Yes (moderate)	No	No	No	Yes (mild)	No	Yes (mild)	No	6
T37	37	Married	Tertiary	Self Employed	21	4	3	No		No	No	No	No	Yes	No	No	No	No	Yes (mild)	Yes (moderate)	Yes (moderate)	Yes (mild)	No	Yes (mild)	No	Yes (moderate)	No	13
T51	41	Married	Tertiary	Business	16	2	3	No		Yes	Yes	No	No	No	No	No	No	No	Yes (mild)	Yes (moderate)	No	No	No	Yes (mild)	No	Yes (very severe)	No	8
T76	45	Widowed	Secondary	Self Employed	16	3	3	No		Yes	Yes	No	No	No	No	No	Yes (mild)	No	Yes (moderate)	Yes (moderate)	No	Yes (moderate)	Yes (severe)	No	No	Yes (moderate)	No	11
T85	43	Widowed	Secondary	Self Employed	17	1	2	Yes		No	No	No	Yes (occasionally)	No	No	No	Yes (mild)	No	Yes (moderate)	Yes (moderate)	No	No	No	No	No	No	No	9
T86	40	Married	Tertiary	Entrepreneur	16	2	3	Yes		Yes	Yes	No	No	No	No	No	No	No	Yes (mild)	Yes (moderate)	No	No	No	No	No	No	No	4
T87	45	Widowed	Secondary	Unemployed	15	1	1	No		Yes	No	No	No	No	No	Yes (mild)	No	Yes (severe)	No	Yes (moderate)	No	Yes (mild)	Yes (mild)	No	No	Yes (mild)	No	5
T123	47	Widowed	Secondary	Civil Servant	12	4	2	Yes		Yes	No	No	yes	Yes	No	No	No	No	Yes (severe)	Yes (moderate)	yes (very severe)	yes (mild)	Yes (Moderate)	No	No	Yes (mild)	No	15
T180	44	Married	Secondary	company	12	3	1	No		Yes	No	No	No	No	No	No	No	No	No	Yes (moderate)	Yes (mild)	Yes (moderate)	Yes (mild)	No	No	No	Yes	6
T199	36	Married	Tertiary	Fashion Designer	16	2	1	No		No	Yes	No	No	No	No	No	Yes (mild)	Yes (severe)	No	Yes (moderate)	No	Yes (moderate)	No	No	No	No	No	4
T223	45	Single	Secondary	Trader	Unk	0	2	No		Yes	No	No	No	Yes	No	No	No	No	No	Yes (moderate)	Yes (mild)	Yes (moderate)	Yes (mild)	No	No	No	No	8
T156	39	Married	Secondary	Trader	14	3	6	Yes		Yes	Yes	No	No	No	No	No	No	No	No	Yes (severe)	Yes (severe)	Yes (mild)	No	No	No	No	No	10
T167	46	Married	Tertiary	Self Employed	13	0	2	Yes		Yes	Yes	No	Yes	Yes	No	No	Yes (mild)	No	Yes (moderate)	Yes (severe)	Yes (mild)	Yes (severe)	Yes (Moderate)	No	No	No	No	14
T111	35	Married	Secondary	Business	18	1	1	Yes		No	Yes	No	yes	No	No	No	No	No	Yes (moderate)	Yes (very severe)	Yes (mild)	Yes (mild)	No	No	No	No	No	10

## Sheet: Postmenopausal
Form No.	Age(Yrs)	Marital Status	Education(Level)	Occupation	Menarche (Age)	Parity(no of children)	No.of sexual partners	History of Menorrhagia	Age of Last Period (Yrs)	Contraception	Sexually active	Cigarette smoking	Alcohol use	Hypertension	Diabetes Mellitus	Night sweating (Som)	Cardiac complaints (Som)	Sleeping disorders (Som)	Joint/muscle complaints (Som)	Depression (Psy)	Irritable (Psy)	Anxious (Psy)	Exhausted (Psy)	Sexual problems (Uro)	Urinary complaints (Uro)	Vaginal dryness (Uro)	Hormone Replace Therapy	MRS
T160	39	Married	Tertiary	Trader	16	3	3	Yes		Yes	Yes	No	No	No	No	No	No	No	No	No	No	No	No	No	No	No	No	2
T161	50	Divorced	Tertiary	Teacher	15	0	5	No	47	No	No	No	No	No	No	No	No	No	No	No	No	No	No	No	No	No	No	1
T162	49	Married	Secondary	Trader	Unk	3	1	No	49	Yes	Yes	No	No	No	No	No	No	No	No	No	No	Yes (mild)	No	No	No	No	No	1
T163	46	Widowed	Tertiary	Marketer	13	1	Unk	No	46	Yes	No	No	yes	No	No	Yes (moderate)	No	No	No	No	No	Yes (mild)	No	No	No	No	No	3
T164	41	Widowed	Secondary	Unemployed	Unk	4	1	Yes		No	No	No	No	Yes	No	No	No	No	No	No	Yes (mild)	No	No	No	No	No	No	1
T165	42	Single	Tertiary	Trader	13	3	1	No		Yes	No	No	No	No	No	No	No	No	Yes (moderate)	No	No	No	Yes (mild)	Yes (moderate)	No	No	No	5
T166	53	Married	Tertiary	Trader	12	3	Unk	No	49	Yes	Yes	No	No	No	No	Yes (mild)	No	No	Yes (moderate)	No	No	No	No	No	No	Yes (mild)	No	4
T168	39	Married	Secondary	Hairdresser	10	2	5	No		No	Yes	No	No	No	No	No	No	No	No	No	No	No	No	No	No	No	No	0
T169	43	Married	Primary	Hairdresser	15	3	10	Yes		Yes	Yes	Yes	Yes	No	No	No	No	No	No	No	No	No	No	No	No	No	No	0
T170	52	Widowed	Tertiary	Civil Servant	Unk	1	6	Yes	46	No	Yes	No	No	Yes	No	No	No	No	No	No	No	No	No	No	No	No	No	0
T171	40	Married	Secondary	HouseWife	13	0	1	No		No	No	No	No	No	No	No	No	No	Yes (moderate)	No	No	No	No	No	No	No	No	2
T175	48	Married	Tertiary	Chemist	13	3	1	Yes	48	No	Yes	No	No	No	No	No	No	No	No	No	Yes (mild)	No	No	No	No	No	No	2
T176	43	Married	Tertiary	Self Employed	12	3	3	No		Yes	Yes	No	Yes	Yes	No	No	No	Yes (mild)	Yes (moderate)	No	No	yes (mild)	Yes (mild)	No	No	No	No	5
T181	47	Married	Primary	Trader	17	4	1	No		Yes	Yes	No	No	No	No	Yes (mild)	No	No	No	No	No	No	No	No	No	No	No	1
T182	39	Married	Tertiary	Self Employed	16	4	Unk	No		Yes	Yes	No	Yes	No	No	No	No	No	No	No	No	No	No	No	No	No	No	0
T184	48	Married	Secondary	Unemployed	13	2	1	No	37	Yes	Yes	No	No	No	No	No	No	No	Yes (severe)	No	No	No	No	No	No	No	Yes	3
T185	52	Married	Tertiary	Self Employed	12	4	2	No	47	No	Yes	No	No	No	No	No	No	No	No	No	No	No	No	No	No	No	No	0
T186	47	Married	Secondary	Trader	Unk	4	1	Yes		Yes	Yes	No	No	No	No	No	No	No	Yes (mild)	No	No	No	No	No	No	Yes (mild)	No	2
T188	45	Married	Secondary	Trader	18	3	3	Yes		No	Yes	No	No	No	No	No	No	No	No	No	No	Yes (mild)	No	No	No	No	No	1
T189	53	Married	No Formal	Trader	18	3	3	No	52	Yes	No	No	No	No	No	No	Yes (moderate)	No	No	No	No	No	No	No	No	No	No	3
T191	45	Married	Secondary	Artisan	15	2	4	No		Yes	Yes	No	yes	No	No	No	No	No	Yes (mild)	No	No	No	No	yes (mild)	No	No	No	2
T192	41	Married	Tertiary	skin therapist	Unk	3	Unk	Yes		Yes	Yes	No	No	No	No	No	No	No	No	No	No	No	No	No	No	No	No	0
T193	56	Widowed	Secondary	Catering	17	1	1	Yes	52	Yes	No	No	No	No	No	No	No	No	No	No	Yes (mild)	Yes (mild)	No	No	No	No	No	2
T195	49	Married	Tertiary	Civil Servant	16	3	1	No		Yes	Yes	No	No	No	No	No	No	No	Yes (severe)	No	No	No	No	No	No	No	No	3
T196	40	Single	Primary	Self Employed	Unk	1	2	Yes	40	Yes	No	No	No	No	No	No	No	Yes (mild)	Yes (moderate)	No	No	No	No	No	No	No	No	3
T198	53	Widowed	Secondary	Trader	Unk	3	1	Yes	52	No	No	No	No	No	No	Yes (mild)	No	Yes (mild)	No	No	No	No	No	No	No	No	No	2
T202	52	Divorced	Secondary	Massuese	15	4	2	No	52	Yes	No	Yes	Yes	No	No	No	No	No	No	No	No	No	No	No	No	No	Yes	0
T203	43	Married	Secondary	Trader	15	4	1	No	40	Yes	No	No	Yes	No	No	Yes (very severe)	No	yes (mild)	No	No	No	Yes (mild)	No	No	No	No	No	6
T204	50	Married	Secondary	Trader	16	4	1	No		Yes	Yes	No	No	No	No	No	No	No	No	No	No	No	No	No	No	No	No	0
T206	59	Widowed	Primary	Trader	Unk	0	2	No	45	No	No	No	Yes	No	No	No	No	No	Yes (mild)	No	No	No	Yes (mild)	No	No	No	No	2
T207	47	Married	Secondary	Catering	17	5	1	Yes		No	Yes	No	No	No	No	No	No	No	Yes (severe)	No	No	No	Yes (Moderate)	No	no	no	Yes	5
T208	44	Married	Secondary	Fashion Designer	13	1	4	Yes		No	Yes	No	Yes	Yes	No	No	Yes (mild)	yes (mild)	Yes (moderate)	No	No	Yes (moderate)	Yes (Moderate)	No	Yes (moderate)	Yes (mild)	No	11
T209	65	Widowed	Secondary	Unemployed	15	6	1	Yes	52	No	No	No	No	No	No	No	No	No	Yes (mild)	No	No	No	No	No	No	Yes (mild)	No	2
T210	47	Single	Tertiary	Nurse	15	1	3	Yes		Yes	Yes	No	No	No	No	No	No	No	No	No	No	No	No	No	No	No	Yes	0
T211	50	Married	Secondary	Trader	Unk	2	1	No		No	No	No	No	No	No	No	No	No	No	No	No	No	No	No	No	No	No	0
T212	70	Single	Secondary	Nanny	Unk	1	1	No	59	No	No	No	No	No	No	No	No	No	Yes (mild)	No	No	No	No	No	No	No	No	1
T213	40	Widowed	Tertiary	Self Employed	12	2	6	No		Yes	Yes	No	yes	No	No	No	No	No	No	No	No	No	No	No	No	No	No	0
T214	54	Married	Tertiary	Trader	14	0	2	No	53	No	No	No	No	No	No	No	No	yes (mild)	No	No	No	No	No	No	No	No	Yes	1
T215	62	Widowed	Secondary	Retired	15	4	2	No	53	No	No	No	No	Yes	No	No	No	No	No	No	No	No	No	No	No	No	No	0
T216	47	Married	Tertiary	Teacher	16	4	1	No		Yes	Yes	No	No	No	No	No	No	yes (mild)	No	No	No	No	No	No	No	No	No	1
T218	44	Married	Tertiary	Teacher	12	1	2	No		Yes	Yes	No	yes	No	No	No	No	No	Yes (moderate)	No	Yes (moderate)	Yes (mild)	No	No	No	No	No	5
T222	40	Married	Secondary	Trader	Unk	4	2	Yes		Yes	Yes	No	No	No	No	No	No	No	No	No	No	No	No	No	No	No	No	0
T224	40	Married	Secondary	Trader	17	3	3	No		No	Yes	No	No	No	No	No	No	No	Yes (moderate)	No	No	No	No	No	No	No	No	2
T225	43	Married	Secondary	Trader	Unk	2	1	Yes		Yes	Yes	No	No	No	No	No	No	No	Yes (moderate)	No	Yes (mild)	Yes (mild)	No	No	No	No	No	4
T226	38	Married	Secondary	Trader	Unk	3	5	No		No	Yes	No	yes	No	No	No	Yes (mild)	No	No	No	Yes (mild)	No	No	No	No	Yes (severe)	No	5
T227	40	Married	Tertiary	Influencer	15	3	2	Yes		Yes	Yes	No	No	Yes	No	No	Yes (moderate)	No	No	No	No	No	Yes (mild)	No	No	No	Yes	3
T228	47	Single	Tertiary	Trader	14	0	3	Yes		Yes	No	No	No	Yes	No	No	No	No	Yes (mild)	No	No	No	No	No	No	No	No	1
T229	56	Separated	Tertiary	Trader	11	1	1	Yes	54	No	No	No	No	Yes	No	Yes (moderate)	No	No	Yes (moderate)	No	No	No	No	No	No	No	No	4
T230	45	Widowed	Secondary	Trader	16	3	7	No		Yes	Yes	No	Yes	No	No	No	No	No	Yes (severe)	No	No	No	No	No	No	Yes (very severe)	No	7
T231	44	Married	Tertiary	Business	14	3	3	No		Yes	Yes	No	Yes	No	No	No	No	No	No	No	No	No	No	No	No	No	No	0
T232	39	Married	Secondary	Unemployed	16	2	2	No		No	Yes	No	No	No	No	No	Yes (mild)	No	No	No	No	No	Yes (Moderate)	No	No	No	No	3
T233	56	Widowed	Primary	Trader	14	4	1	No	45	No	No	No	Yes	No	No	No	No	No	No	No	No	No	No	No	No	No	No	0
T234	44	Married	No Formal	Trader	unk	4	1	No		No	Yes	No	No	No	No	No	No	No	Yes (moderate)	No	No	No	No	No	No	No	No	2
T236	58	Widowed	Tertiary	Teacher	unk	2	1	No	45	No	No	No	Yes	Yes	No	Yes (mild)	No	No	Yes (moderate)	No	No	No	No	No	No	No	No	3
T237	46	Married	Secondary	Trader	15	4	3	No		Yes	Yes	No	No	No	No	No	No	No	No	No	No	No	No	No	No	No	No	0
T238	39	Married	Tertiary	Fashion Designer	15	1	5	No		Yes	Yes	No	No	No	No	Yes (mild)	No	Yes (severe)	No	No	No	No	No	Yes (mild)	No	Yes (moderate)	Yes	7
T239	54	Widowed	Primary	Nurse	12	5	1	No	46	No	No	No	No	No	No	No	No	No	No	No	No	No	No	No	No	No	No	0
T240	52	Widowed	Secondary	Trader	12	7	1	No	48	No	No	No	No	No	No	No	No	No	Yes (moderate)	No	No	No	No	No	No	No	No	2
T241	61	Married	Secondary	HouseWife	13	3	1	Yes	43	Yes	No	No	No	No	No	Yes (severe)	Yes (mild)	No	Yes (very severe)	No	No	No	No	No	No	No	No	11
T243	59	Widowed	Secondary	Trader	unk	4	1	No	39	No	No	No	Yes	Yes	No	No	No	No	Yes (severe)	No	No	No	Yes (mild)	No	No	No	No	4
T244	40	Single	Secondary	Self Employed	17	1	8	No		Yes	Yes	No	Yes	No	No	No	No	No	Yes (mild)	No	No	No	Yes (mild)	No	No	No	No	2
T173	40	Married	Secondary	Farmer	15	4	3	Yes		Yes	Yes	No	No	No	No	yes (moderate)	Yes (moderate)	yes (mild)	yes (mild)	yes (mild)	yes (mild)	yes (moderate)	Yes (mild)	No	No	yes (mild)	No	12
T178	48	Single	Tertiary	Trader	15	1	6	No		Yes	Yes	No	No	Yes	No	No	Yes (moderate)	Yes (mild)	Yes (mild)	Yes (mild)	Yes (mild)	Yes (moderate)	No	No	No	No	Yes	8
T187	47	Separated	Tertiary	Self Employed	15	1	1	No		Yes	Yes	No	No	No	No	No	No	No	Yes (mild)	Yes (mild)	Yes (mild)	No	No	No	No	No	Yes	3
T200	46	Widowed	Tertiary	Teacher	12	3	3	Yes		No	No	No	Yes	Yes	No	Yes (moderate)	No	No	Yes (mild)	yes (mild)	No	No	Yes (severe)	No	No	No	No	7
T205	45	Widowed	Secondary	Civil Servant	19	2	1	No		No	No	No	No	No	No	No	No	No	Yes (mild)	yes (mild)	No	Yes (mild)	Yes (mild)	No	Yes (mild)	No	No	5
T217	48	Widowed	Secondary	Trader	13	1	2	Yes	41	No	No	No	No	No	No	Yes (mild)	No	No	Yes (mild)	Yes (mild)	Yes (moderate)	No	Yes (mild)	No	No	No	No	6
T220	53	Married	Secondary	Fashion Designer	12	2	3	Yes	52	Yes	Yes	No	No	Yes	No	Yes (mild)	No	No	Yes (mild)	Yes (mild)	Yes (mild)	Yes (mild)	Yes (Moderate)	no	Yes (moderate)	No	No	13
T221	55	Widowed	Tertiary	Nanny	18	2	2	No	48	Yes	No	No	No	No	No	Yes (severe)	Yes (mild)	No	Yes (mild)	Yes (mild)	No	No	No	No	No	No	No	6
T235	40	Married	Tertiary	Trader	15	2	1	No		No	No	No	No	No	No	No	No	No	Yes (mild)	Yes (mild)	No	Yes (mild)	Yes (Moderate)	No	No	Yes (severe)	No	8
T177	50	Divorced	Secondary	Self Employed	13	4	3	No		Yes	No	No	Yes	No	No	Yes (severe)	No	No	Yes (moderate)	Yes (moderate)	Yes (moderate)	No	No	No	No	Yes (mild)	No	10
T180	44	Married	Secondary	company	12	3	1	No		Yes	No	No	No	No	No	No	No	No	No	Yes (moderate)	Yes (mild)	Yes (moderate)	Yes (mild)	No	No	No	Yes	6
T190	60	Married	Primary	Trader	15	5	4	No	53	No	Yes	No	No	Yes	Yes	No	No	No	Yes (mild)	Yes (moderate)	No	No	No	No	No	No	No	5
T197	60	Widowed	Secondary	Catering	15	3	3	Yes	51	No	No	No	yes	Yes	No	No	Yes (mild)	Yes (moderate)	Yes (mild)	Yes (moderate)	No	No	No	No	No	No	No	6
T223	45	Single	Secondary	Trader	Unk	0	2	No	40	Yes	No	No	No	Yes	No	Yes (mild)	No	Yes (moderate)	No	Yes (moderate)	Yes (mild)	Yes (moderate)	Yes (mild)	No	No	No	No	8
T167	46	Married	Tertiary	Self Employed	13	0	2	Yes		Yes	Yes	No	Yes	Yes	No	No	No	Yes (moderate)	Yes (moderate)	Yes (severe)	Yes (mild)	Yes (severe)	Yes (Moderate)	No	No	No	No	14
T247	44	Married	Tertiary	Self Employed	14	3	2	Yes	45	Yes	Yes	No	No	Yes	No	No	No	No	Yes (mild)	No	No	No	No	Yes (mild)	No	No	No	4
T248	47	Married	Secondary	Hairdresser	15	3	3	Yes	57	No	Yes	Yes	No	No	No	No	No	Yes (moderate)	Yes (moderate)	No	No	Yes (mild)	No	No	Yes (mild)	No	No	6
T249	39	Married	Primary	Hairdresser	17	0	1	No		Yes	Yes	No	No	No	No	No	No	No	Yes (very severe)	No	Yes (mild)	No	No	no	No	Yes (mild)	No	2
T250	35	Divorced	Tertiary	Civil Servant	13	2	1	Yes	46	No	No	No	No	Yes	No	No	No	No	No	No	No	Yes (mild)	No	No	No	No	No	4
T251	48	Divorced	Secondary	HouseWife	12	3	3	Yes	52	Yes	No	No	No	No	No	No	No	No	No	No	No	No	No	No	No	No	No	4
T252	52	Married	Tertiary	Teacher	13	1	2	Yes	51	No	No	Yes	No	Yes	No	No	No	No	Yes (very severe)	No	No	No	No	No	No	No	No	7
T253	47	Married	Secondary	Farmer	15	0	2	Yes	47	Yes	No	No	No	No	No	No	Yes (moderate)	No	No	No	No	Yes (moderate)	No	No	No	No	No	8
T254	47	Married	Tertiary	Chef	13	0	1	No		No	Yes	Yes	No	No	Yes	No	Yes (mild)	No	Yes (mild)	Yes (severe)	No	No	No	No	No	No	No	9
T255	45	Married	Tertiary	Chemist	12	4	1	Yes	48	Yes	Yes	No	No	No	No	Yes (mild)	No	No	No	No	No	No	No	No	No	No	No	4
T256	53	Married	Tertiary	Self Employed	17	5	1	Yes	55	No	Yes	No	No	No	No	No	No	No	Yes (moderate)	No	No	No	No	No	No	No	No	9
T257	60	Single	Secondary	Self Employed	16	3	2	Yes	49	No	Yes	Yes	No	yes	No	No	No	No	Yes (mild)	No	No	No	No	No	No	No	No	7
T258	45	Married	Tertiary	Trader	19	3	1	Yes	50	Yes	No	No	No	No	No	No	No	No	Yes (mild)	No	Yes (mild)	No	No	No	No	No	No	3
T259	41	Married	Primary	Cleaner	13	4	4	No		No	No	No	No	No	No	Yes (mild)	Yes (severe)	Yes (moderate)	No	No	No	No	No	No	No	No	No	3
T260	56	Married	Secondary	company	12	1	1	Yes	47	No	No	Yes	No	No	No	No	No	No	No	yes (mild)	No	No	No	No	No	No	No	6
T261	37	Married	Primary	Trader	15	5	3	Yes	48	No	No	Yes	No	No	Yes	Yes (moderate)	Yes (mild)	No	Yes (mild)	Yes (mild)	No	No	No	No	No	No	No	2
T262	49	Married	Tertiary	Self Employed	13	3	1	Yes	50	No	No	No	No	yes	No	No	No	No	No	No	No	No	No	No	No	No	No	4
T263	40	Married	Secondary	Self Employed	14	4	1	Yes	47	No	Yes	Yes	No	No	No	No	Yes (mild)	No	No	No	No	Yes (mild)	No	No	No	No	No	7
T264	60	Single	Secondary	Unemployed	15	4	6	No		No	No	No	No	No	No	Yes (very severe)	No	No	No	Yes (moderate)	No	No	No	No	No	Yes (mild)	No	7
T265	53	Married	Tertiary	Self Employed	17	0	2	Yes	44	No	No	No	No	No	No	No	No	No	No	Yes (mild)	No	Yes (mild)	No	No	No	No	No	0
T266	36	Single	Secondary	Trader	unk	2	2	Yes	47	No	Yes	Yes	No	No	Yes	No	No	No	Yes (mild)	No	No	No	Yes (severe)	No	No	No	No	6
T267	46	Married	Tertiary	Self Employed	12	4	1	Yes	48	No	No	No	No	No	No	No	Yes (mild)	Yes (mild)	Yes (mild)	Yes (moderate)	No	No	No	No	No	No	no	0
T268	37	Married	Secondary	Trader	13	4	2	No	45	No	No	No	No	yes	No	No	Yes (mild)	No	No	No	No	Yes (moderate)	No	Yes (mild)	No	No	No	5
T269	52	Married	No Formal	Trader	14	1	2	Yes	47	No	Yes	Yes	No	No	Yes	No	No	No	Yes (mild)	No	No	No	No	No	No	No	No	2
T270	43	Married	Primary	Trader	13	3	2	Yes	47	No	No	No	No	No	No	No	No	No	Yes (moderate)	No	No	No	No	No	No	no	No	5
T271	50	Single	Secondary	Artisan	12	3	3	Yes	43	No	Yes	Yes	No	Yes	No	No	No	No	Yes (moderate)	No	No	No	Yes (mild)	No	No	Yes (mild)	No	11
T272	45	Widowed	Tertiary	skin therapist	17	5	2	Yes	47	Yes	Yes	Yes	No	No	No	No	Yes (mild)	No	No	No	Yes (mild)	Yes (mild)	Yes (mild)	No	No	Yes (mild)	Yes	2
T273	59	Married	Secondary	Catering	16	2	2	No		No	Yes	Yes	No	No	No	No	No	No	Yes (mild)	No	No	No	Yes (Moderate)	No	No	No	Yes	0
T274	47	Married	Secondary	Clergy	19	3	2	Yes	50	Yes	Yes	No	No	No	Yes	No	No	No	No	Yes (mild)	No	Yes (mild)	Yes (Moderate)	No	No	No	No	0
T275	44	Divorced	Tertiary	Civil Servant	13	1	5	Yes	47	No	Yes	Yes	No	Yes	Yes	No	Yes (severe)	No	No	No	Yes (moderate)	No	No	No	No	No	No	1
T276	65	Widowed	Primary	Self Employed	12	1	3	Yes	47	No	Yes	No	No	Yes	Yes	No	No	No	No	No	Yes (mild)	No	No	No	No	No	No	0
T277	47	Married	Secondary	Catering	Unk	3	1	Yes	44	No	No	Yes	No	No	No	No	No	No	Yes (mild)	Yes (moderate)	Yes (mild)	Yes (moderate)	No	No	No	No	No	1
T278	50	Single	Secondary	Trader	13	1	1	No		No	No	Yes	No	Yes	No	Yes (mild)	No	Yes (mild)	Yes (mild)	No	No	No	No	No	No	No	No	3
T279	70	Married	Tertiary	Fashion Designer	14	3	2	Yes	47	Yes	Yes	Yes	No	No	No	No	No	No	No	No	No	No	No	Yes (mild)	No	No	No	1
T280	40	Married	Tertiary	Teacher	15	3	3	Yes	46	Yes	No	Yes	No	No	No	No	No	No	Yes (moderate)	No	No	No	No	No	No	Yes (mild)	No	6
T281	54	Married	Secondary	Trader	17	2	1	No		Yes	Yes	Yes	No	Yes	No	Yes (mild)	No	No	Yes (mild)	Yes (mild)	No	No	No	No	No	No	No	5
T282	62	Married	Secondary	Massuese	13	3	1	Yes	48	No	Yes	No	No	No	No	Yes (severe)	No	No	No	No	No	No	No	No	No	No	No	7
T283	47	Single	Secondary	Trader	12	2	3	No		No	No	No	No	No	Yes	No	No	No	Yes (mild)	No	No	No	Yes (mild)	No	Yes (mild)	Yes (mild)	No	12
T284	48	Married	Secondary	Trader	13	4	2	Yes	48	Yes	Yes	Yes	No	No	No	Yes (mild)	No	No	Yes (mild)	Yes (moderate)	No	No	No	No	No	No	No	3
T285	44	Married	Secondary	Civil Servant	15	4	2	Yes	46	No	Yes	Yes	No	No	No	No	No	No	Yes (mild)	No	Yes (moderate)	No	Yes (Moderate)	No	No	No	No	3
T286	35	Single	Primary	Trader	13	4	1	Yes	45	No	No	Yes	No	No	No	No	No	No	Yes (severe)	Yes (moderate)	Yes (mild)	No	No	No	No	No	No	1
T287	53	Married	Secondary	Catering	12	2	1	No		Yes	No	No	No	yes	No	No	No	No	Yes (severe)	yes (mild)	Yes (severe)	Yes (mild)	No	No	No	No	No	2
T288	55	Widowed	Secondary	Fashion Designer	17	0	1	Yes	47	Yes	No	Yes	No	Yes	No	No	No	No	No	yes (mild)	No	No	No	Yes (mild)	No	No	No	2
T289	40	Single	Secondary	Unemployed	16	5	2	Yes	49	No	No	No	No	Yes	No	No	No	No	Yes (moderate)	No	No	Yes (mild)	No	No	No	No	No	1
T290	45	Widowed	Tertiary	Nurse	19	1	1	Yes	46	No	No	No	No	No	No	No	No	No	No	No	Yes (mild)	No	Yes (severe)	No	No	No	No	2
T291	38	Married	Secondary	Trader	13	6	4	Yes	46	No	Yes	Yes	No	Yes	Yes	Yes (moderate)	No	Yes (mild)	No	No	No	No	No	No	No	No	No	2
T292	40	Widowed	Secondary	Trader	Unk	1	1	No		Yes	Yes	Yes	No	No	No	No	Yes (mild)	Yes (moderate)	No	yes (mild)	No	Yes (moderate)	No	Yes (severe)	No	No	No	6
T293	43	Married	Tertiary	Self Employed	Unk	2	3	Yes	47	No	No	No	No	No	No	No	No	No	No	No	No	No	No	No	No	No	Yes	1
T294	38	Single	Tertiary	Hairdresser	13	1	1	Yes	48	No	No	No	No	No	No	No	Yes (mild)	No	No	No	No	No	Yes (mild)	No	No	No	No	5
T295	40	Married	Secondary	Hairdresser	14	2	1	Yes	47	Yes	Yes	No	No	Yes	No	No	No	No	No	No	No	No	No	No	No	No	No	2
T296	47	Widowed	Tertiary	Civil Servant	15	0	6	Yes	46	No	Yes	Yes	No	Yes	No	No	Yes (mild)	No	Yes (mild)	No	No	Yes (mild)	Yes (Moderate)	No	No	No	No	0
T297	56	Married	Secondary	HouseWife	16	4	2	Yes	47	Yes	No	No	No	No	No	No	No	No	Yes (mild)	No	No	No	No	No	No	No	No	0
T298	45	Married	Tertiary	Teacher	13	4	2	Yes	47	Yes	Yes	Yes	No	Yes	Yes	Yes (mild)	No	No	No	No	No	Yes (mild)	No	No	No	Yes (mild)	Yes	1
T299	44	Widowed	Tertiary	Farmer	12	1	1	Yes	48	No	Yes	No	No	No	No	No	No	No	Yes (moderate)	No	Yes (mild)	No	No	No	No	No	No	4
T300	39	Married	Secondary	Chef	13	1	2	Yes	50	Yes	Yes	No	No	No	No	Yes (mild)	Yes (mild)	No	Yes (mild)	No	No	No	No	Yes (mild)	No	No	No	1
T301	56	Widowed	Tertiary	Chemist	15	0	2	Yes	49	Yes	Yes	Yes	No	Yes	No	No	No	No	No	No	No	Yes (moderate)	Yes (mild)	No	No	No	No	3
T302	44	Single	Secondary	Self Employed	12	2	2	Yes	48	Yes	Yes	No	No	No	No	No	No	No	Yes (mild)	No	No	No	No	No	No	No	No	0
T303	40	Single	Secondary	Self Employed	12	2	3	Yes	47	Yes	No	No	No	No	Yes	Yes (severe)	No	Yes (moderate)	Yes (mild)	No	No	No	No	Yes (moderate)	No	No	No	3
T304	58	Married	Tertiary	Trader	17	4	2	Yes	46	No	No	No	No	No	No	No	No	No	Yes (mild)	Yes (mild)	No	No	No	Yes (moderate)	No	no	No	6
T305	46	Married	Tertiary	Cleaner	16	0	2	Yes	45	No	No	Yes	No	No	No	No	No	No	Yes (severe)	No	No	No	Yes (mild)	No	No	Yes (mild)	No	7
T306	39	Widowed	Secondary	company	19	3	2	Yes	47	No	No	No	No	No	Yes	No	No	No	Yes (severe)	Yes (mild)	No	No	No	No	No	Yes (mild)	Yes	0
T307	54	Married	Primary	Trader	13	3	5	Yes	48	No	Yes	Yes	No	yes	No	No	No	No	No	No	No	No	Yes (Moderate)	No	No	No	No	5
T308	52	Widowed	Tertiary	Self Employed	14	2	3	Yes	44	No	Yes	No	No	Yes	No	No	No	No	Yes (moderate)	No	No	No	No	No	No	No	No	3
T309	61	Married	Secondary	Self Employed	Unk	3	1	Yes	46	No	Yes	No	No	Yes	No	Yes (mild)	No	No	No	Yes (moderate)	No	No	No	No	No	No	No	6
T310	35	Widowed	Tertiary	Unemployed	16	3	1	Yes	46	No	Yes	Yes	No	No	No	No	No	No	No	No	No	No	No	Yes (moderate)	No	No	No	3
T311	59	Married	Secondary	Self Employed	13	0	1	Yes	48	Yes	No	No	No	Yes	Yes	Yes (mild)	No	Yes (mild)	No	No	No	Yes (mild)	No	No	No	No	No	0
T312	40	Married	Tertiary	Trader	12	1	3	Yes	49	No	No	No	No	No	Yes	No	No	No	No	No	No	No	No	No	No	No	No	4
T313	46	Divorced	Tertiary	Self Employed	13	3	5	Yes	51	Yes	No	Yes	No	No	Yes	No	No	No	No	Yes (mild)	Yes (mild)	Yes (mild)	No	No	No	No	No	6
T314	49	Widowed	Tertiary	Trader	15	3	3	Yes	49	No	No	Yes	No	No	No	Yes (severe)	No	No	Yes (mild)	No	No	No	No	No	No	Yes (mild)	No	9
T315	51	Married	Secondary	Trader	12	2	1	Yes	47	Yes	No	No	No	Yes	No	No	No	No	Yes (mild)	No	No	No	No	Yes (mild)	No	No	No	9
T316	44	Married	Tertiary	Trader	12	4	0	Yes	48	No	Yes	Yes	No	Yes	No	No	No	No	No	Yes (moderate)	Yes (moderate)	Yes (moderate)	Yes (mild)	No	No	No	No	8
T317	64	Married	Primary	Artisan	17	4	1	Yes	44	Yes	No	No	No	No	No	No	No	No	Yes (moderate)	No	Yes (mild)	No	No	No	No	Yes (mild)	No	9
T318	43	Widowed	Secondary	skin therapist	16	2	0	Yes	46	No	No	No	No	Yes	No	No	No	No	Yes (mild)	Yes (moderate)	No	No	Yes (Moderate)	No	Yes (mild)	No	No	7
T319	48	Married	Primary	Catering	19	2	Unk	Yes	46	Yes	Yes	Yes	No	No	No	No	No	No	No	yes (mild)	No	No	No	No	No	No	No	9
T320	44	Widowed	Tertiary	Clergy	13	4	1	Yes	48	No	No	No	No	No	Yes	No	No	No	Yes (mild)	yes (mild)	No	Yes (mild)	No	Yes (moderate)	No	No	No	10
T321	43	Married	Secondary	Civil Servant	14	1	3	Yes	49	Yes	No	No	No	Yes	No	No	No	No	Yes (mild)	No	No	No	No	No	No	No	No	9
T322	49	Single	Secondary	Self Employed	Unk	5	2	Yes	51	No	Yes	Yes	No	No	No	No	Yes (severe)	Yes (mild)	No	Yes (mild)	No	Yes (mild)	Yes (Moderate)	No	No	No	No	4
T323	53	Married	Tertiary	Catering	16	7	2	No		No	No	No	No	No	No	No	No	No	Yes (severe)	No	No	No	No	No	No	No	No	10
T324	52	Widowed	Secondary	Trader	13	3	3	Yes	47	Yes	Yes	Yes	No	No	No	No	Yes (severe)	No	Yes (severe)	No	No	No	No	Yes (mild)	No	No	No	5
T325	52	Married	Tertiary	Fashion Designer	12	3	2	Yes	48	No	Yes	Yes	No	No	No	No	No	No	No	Yes (moderate)	No	Yes (moderate)	No	No	No	No	No	6
T326	44	Married	Secondary	Teacher	13	4	2	Yes	44	No	Yes	Yes	No	No	No	No	No	No	Yes (moderate)	No	Yes (moderate)	No	No	No	No	No	No	8
T327	44	Widowed	No Formal	Trader	15	4	4	Yes	46	No	Yes	No	No	yes	No	Yes (mild)	No	No	No	No	Yes (mild)	No	Yes (mild)	No	No	No	No	9
T328	46	Married	Primary	Massuese	12	4	4	Yes	46	No	Yes	Yes	No	Yes	Yes	No	No	No	No	No	No	No	Yes (mild)	Yes (severe)	No	No	No	7
T329	43	Widowed	Secondary	Trader	12	2	1	Yes	48	No	Yes	No	No	Yes	No	No	No	No	No	Yes (mild)	No	No	Yes (Moderate)	No	No	No	no	5
T330	40	Single	Tertiary	Trader	17	2	4	Yes	49	No	No	Yes	No	No	No	No	No	No	Yes (moderate)	No	No	No	No	No	Yes (mild)	No	No	3
T331	46	Single	Secondary	Civil Servant	16	4	2	Yes	51	No	No	Yes	No	Yes	No	Yes (mild)	No	No	Yes (mild)	No	Yes (mild)	Yes (moderate)	No	Yes (mild)	No	No	No	8
T332	43	Married	Secondary	Trader	19	1	2	Yes	49	No	Yes	Yes	No	No	No	No	No	No	Yes (severe)	Yes (moderate)	No	No	No	No	No	Yes (mild)	No	9
T333	53	Married	Tertiary	Catering	13	5	2	Yes	47	No	No	Yes	No	No	No	Yes (moderate)	No	No	Yes (moderate)	No	No	No	No	No	Yes (mild)	No	No	5
T334	45	Widowed	Tertiary	Fashion Designer	14	7	1	Yes	48	No	Yes	Yes	No	No	No	No	No	No	No	Yes (moderate)	No	No	No	No	No	No	Yes	5
T335	43	Married	Tertiary	Unemployed	Unk	3	4	Yes	44	No	Yes	No	No	Yes	Yes	No	No	Yes (mild)	No	yes (mild)	No	Yes (mild)	No	No	No	No	Yes	4
T336	48	Widowed	Secondary	Nurse	12	3	1	Yes	46	No	No	No	No	Yes	No	Yes (very severe)	No	No	No	yes (mild)	No	No	No	Yes (mild)	No	No	No	6
T337	58	Married	Primary	Trader	12	5	3	Yes	46	No	Yes	Yes	No	No	No	No	No	Yes (mild)	Yes (mild)	Yes (severe)	No	Yes (mild)	No	No	No	No	No	5
T338	59	Widowed	Tertiary	Trader	17	4	1	Yes	48	Yes	Yes	Yes	No	Yes	No	No	No	No	No	No	No	No	Yes (mild)	No	No	no	No	3
T339	51	Married	Secondary	Self Employed	16	6	1	Yes	49	No	No	Yes	No	No	No	No	No	No	No	No	No	No	Yes (mild)	Yes (moderate)	No	Yes (mild)	No	6
T340	44	Married	Tertiary	Hairdresser	19	2	6	Yes	51	Yes	No	No	No	No	Yes	No	No	No	No	No	Yes (mild)	Yes (moderate)	Yes (Moderate)	Yes (mild)	No	No	No	6
T341	64	Widowed	Secondary	Hairdresser	13	1	2	Yes	49	No	No	Yes	No	Yes	No	Yes (moderate)	Yes (moderate)	No	No	No	No	Yes (mild)	Yes (mild)	No	No	No	No	8
T342	43	Married	Tertiary	Civil Servant	14	4	2	Yes	47	No	No	No	No	No	No	No	Yes (mild)	No	Yes (mild)	No	No	No	No	No	No	No	No	2
T343	48	Widowed	Tertiary	HouseWife	13	3	1	Yes	48	No	No	No	No	No	Yes	No	No	No	Yes (moderate)	yes (mild)	No	No	No	No	No	No	No	3
T344	47	Married	Tertiary	Teacher	15	2	3	Yes	48	Yes	Yes	Yes	No	No	Yes	No	No	No	Yes (mild)	No	Yes (mild)	No	Yes (Moderate)	No	No	Yes (mild)	No	3

## Sheet: Perimenopausal
S/No/Form No.	Age(Yrs)	Marital Status	Education (Level)	Occupation	Menarche (Age)	Parity(no of children)	No.of sexual partners	History of Menorrhagia	Age of Last Period (Yrs)	Contraception	Sexually active	Cigarette smoking	Alcohol use	Hypertension	Diabetes Mellitus	Night sweating (Som)	Cardiac complaints (Som)	Sleeping disorders (Som)	Joint/muscle complaints (Som)	Depression (Psy)	Irritable (Psy)	Anxious (Psy)	Exhausted (Psy)	Sexual problems (Uro)	Urinary complaints (Uro)	Vaginal dryness (Uro)	Hormone Replace Therapy	MRS
T174	37	Separated	Tertiary	Chef	17	5	1	Yes		No	No	No	No	No	No	No	No	No	Yes (mild)	Yes (mild)	Yes (severe)	Yes (moderate)	No	No	No	No	No	8
T179	37	Married	Primary	Cleaner	13	5	4	No		Yes	Yes	No	No	No	No	No	No	No	No	No	No	No	No	No	No	No	No	0
T194	37	Widowed	Secondary	Clergy	14	1	4	No	34	Yes	No	No	No	No	No	Yes (mild)	No	Yes (severe)	No	Yes (mild)	Yes (mild)	Yes (mild)	No	No	No	No	No	7
T201	37	Single	Secondary	Trader	18	2	2	No		Yes	Yes	No	Yes	No	No	No	No	No	Yes (mild)	yes (mild)	yes (very severe)	No	No	No	No	Yes (mild)	No	7
T172	46	Married	Tertiary	Teacher	14	0	7	Yes		No	Yes	No	No	No	No	No	No	No	No	No	No	No	Yes (mild)	No	No	yes (mild)	No	2
T199	44	Married	Tertiary	Fashion Designer	16	2	1	No		No	Yes	No	No	No	No	No	No	No	No	Yes (moderate)	No	Yes (moderate)	No	No	No	No	No	4
T183	39	Married	Secondary	Self Employed	19	0	2	Yes		No	Yes	No	No	No	No	Yes (mild)	No	No	Yes (mild)	No	No	Yes (mild)	No	No	No	Yes (mild)	Yes	5
T219	35	Married	Tertiary	Administration	13	0	2	Yes		Yes	Yes	No	No	No	No	No	No	Yes (moderate)	No	Yes (mild)	Yes (mild)	No	Yes (Moderate)	No	No	Yes (mild)	Yes	7
T242	35	Married	Secondary	Trader	16	3	Unk	Yes		Yes	Yes	No	yes	Yes	No	No	No	No	Yes (mild)	Yes (mild)	No	No	Yes (Moderate)	No	No	No	No	4
T2	41	Married	Secondary	Fashion Designer	17	1	3	No		Yes	Yes	No	No	No	No	No	No	No	No	No	No	No	No	No	No	No	No	0
T6	44	Divorced	Secondary	Self Employed	17	2	2	No		No	No	No	No	No	Yes	No	Yes (mild)	Yes (moderate)	Yes (severe)	Yes (moderate)	No	Yes (mild)	Yes (Moderate)	No	Yes (mild)	Yes (moderate)	No	14
T17	44	Married	Secondary	Self Employed	14	4	3	No		No	No	No	Yes (mild)	No	No	No	No	No	No	No	Yes (mild)	No	No	No	No	Yes (mild)	No	2

## Sheet: Analysis_HIV_Grp
		Average age	47								No.	%
		Marital Status	No.	%		Education	No.	%		Mean age @ menarche	14.8	NA	Unk 28		Somatic symptoms	YES	%	NO	%
		Single	41	11.9		No_Formal	10	2.9		Range	10_21				sweating/flushes	40	16.8	204	84.01
		Married	197	57.3		Primary	41	11.9		Mean Parity	3				cardiac complaint	38	15.5	206	84.4
		Widowed	76	22.1		Secondary	163	47.4		Range	0_7				sleeping disorders	49	20.1	195	79.9
		Divorced	18	5.2		Tertiary	130	37.8		Mean no. sex partners	3				joint/muscle complaints	143	58.6	101	41.3
		Separated	12	3.5		TOTAL	344			Range	0_10
		TOTAL	344							Mean age at menopause	47.6	NA
										Range age at menopause	34-59				Psychological	YES	%	NO	%
										Attained menopause	175	51			Depression	65	26.6	179	73.4
															Irritability	58	23.7	186	76.2
										Heavy flow					Anxiety	65	26.6	179	73.4
										YES	90	36.89			Exhausted	48	19.6	196	80.3
										NO	154	63.11
										Contraceptive use					Urogenital	YES	%	NO	%
										YES	134	54.9			Sexual Problems	26	10.6	218	89.3
										NO	110	44.1			Urinary Challenges	12	4.9	232	95.1
		no.	%												Vaginal Dryness	52	21.3	192	78.6
	Premenopausal	159	65.2							Sexually active
	Perimenopausal	9	3.7							YES	139	56.9
	Postmenopausal	76	31.1							NO	105	43			Hormonal RT Awareness	YES	%	NO	%
																25	10.2	219	89.8
										Alcohol use
										YES	71	29.1					%
										NO	173	70.9			Av. MRS Total Score	3.8
															Range MRS Score	0_15
										Hypertension					MRS 0 - 4	206	61.6
										YES	64	26.2
										NO	180	73.8
										Diabetes
										YES	9	3.7
										NO	235	96.3
										Hypertension	26.2
										Diabetes	3.7
										No cormobities/others	71.1

## Sheet: Analysis_HIV and Control
															HIV+	WLWH	HIV-	App. Healthy controls
		Average age	47												No.	%	No.	%				Number	%	Number	%
		Marital Status	No. WLWH	%	HIV-	%		Education	No. WLWH	%	HIV-	%		Mean age @ menarche	14.8	NA	14.3	NA	Unk 28		Somatic symptoms	HIV+	WLWH	HIV-	App. Healthy Controls
		Single	41	11.9	15	16.7		No_Formal	10	2.9	5	5.6		Range	10_21		12_16				sweating/flushes	85	25.3	26	28.8
		Married	197	57.3	60	66.6		Primary	41	11.9	7	7.8		Mean Parity	3		3				cardiac complaint	79	23.5	21	23.3
		Widowed	76	22.1	0	0		Secondary	163	47.4	21	23.3		Range	0_7		0_6				sleeping disorders	98	29.2	28	31.1
		Divorced	18	5.2	9	10		Tertiary	130	37.8	57	63.3		Mean no. sex partners	3		2				joint/muscle complaints	199	59.4	47	52.2
		Separated	12	3.5	6	6.7		TOTAL	344		90			Range	0_10		1_5
		TOTAL	344		90									Mean age at menopause	47.6	NA	48.1					Number	%	Number	%
														Range age at menopause	34_59		45_51				Psychological	HIV+	WLWH	HIV-	App. Healthy Controls
														Attained menopause	175	51	48	53.3			Depression	89	26.5	21	23.3
																					Irritability	79	23.5	19	21.1
														Heavy flow							Anxiety	92	27.4	25	27.7
														YES	90	36.89	7	35.2			Exhausted	75	22.3	17	18.8
														NO	154	63.11	11	64.8
																						Number	%	Number	%
														Contraceptive use							Urogenital	HIV+	WLWH	HIV-	App. Healthy Controls
														YES	134	54.9					Sexual Problems	36	10.7	6	6.6
														NO	110	44.1					Urinary Challenges	18	5.3	6	6.6
		no.	%																		Vaginal Dryness	72	21.4	12	13.3
	Premenopausal	157	45.8											Sexually active
	Perimenopausal	12	3.4											YES	139	56.9						Number	%	Number	%
	Postmenopausal	175	50.8											NO	105	43					Hormonal RT Awareness	HIV+	WLWH	HIV-	App. Healthy controls
																						25	10.2	2	11.7
														Alcohol use
														YES	71	29.1							%		%
														NO	173	70.9					Av. MRS Total Score	3.8			6.05
																					Range MRS Score	0_15		0_14
														Hypertension							MRS 0 - 4	206	61.6	17	82.3
														YES	64	26.2
														NO	180	73.8
														Diabetes
														YES	9	2.7
														NO	335	97.3
														Hypertension	26.2
														Diabetes	3.7
														No cormobities/others	71.1
